# Supplementary material for: Metal-free synthesis of nitrile based partially reduced thia-and oxa-thia[5]helicenes: conformation and dynamics
Source: Royal Society of Chemistry journal article supplement (doi:10.1039/c1ra00824b), 2011-12-23
Supplement: c1ra00824b.pdf [file c1ra00824b.pdf]

# Organic & Biomolecular Chemistry

## SUPPORTING INFORMATION

### **Metal-free synthesis of nitrile based partially reduced thia- and oxa-thia[5]helicenes: Conformation and dynamics**

Ramendra Pratap,<sup>a</sup> Abhinav Kumar,<sup>b</sup> Rigoberg Pick,<sup>c</sup> Volker Huch,<sup>d</sup> and Vishnu Ji. Ram<sup>b,\*</sup>

[ramendrapratap@gmail.com](mailto:ramendrapratap@gmail.com), [vjiram@yahoo.com](mailto:vjiram@yahoo.com)

**2-31: NMR spectra of the compounds**

**32-39: Quantum Chemical Calculation detail of 7a**

**3a: 1-Methylsulfanyl-3-oxo-3H,10H-4-oxa-9-thiaphenanthrene-2-carbonitrile**

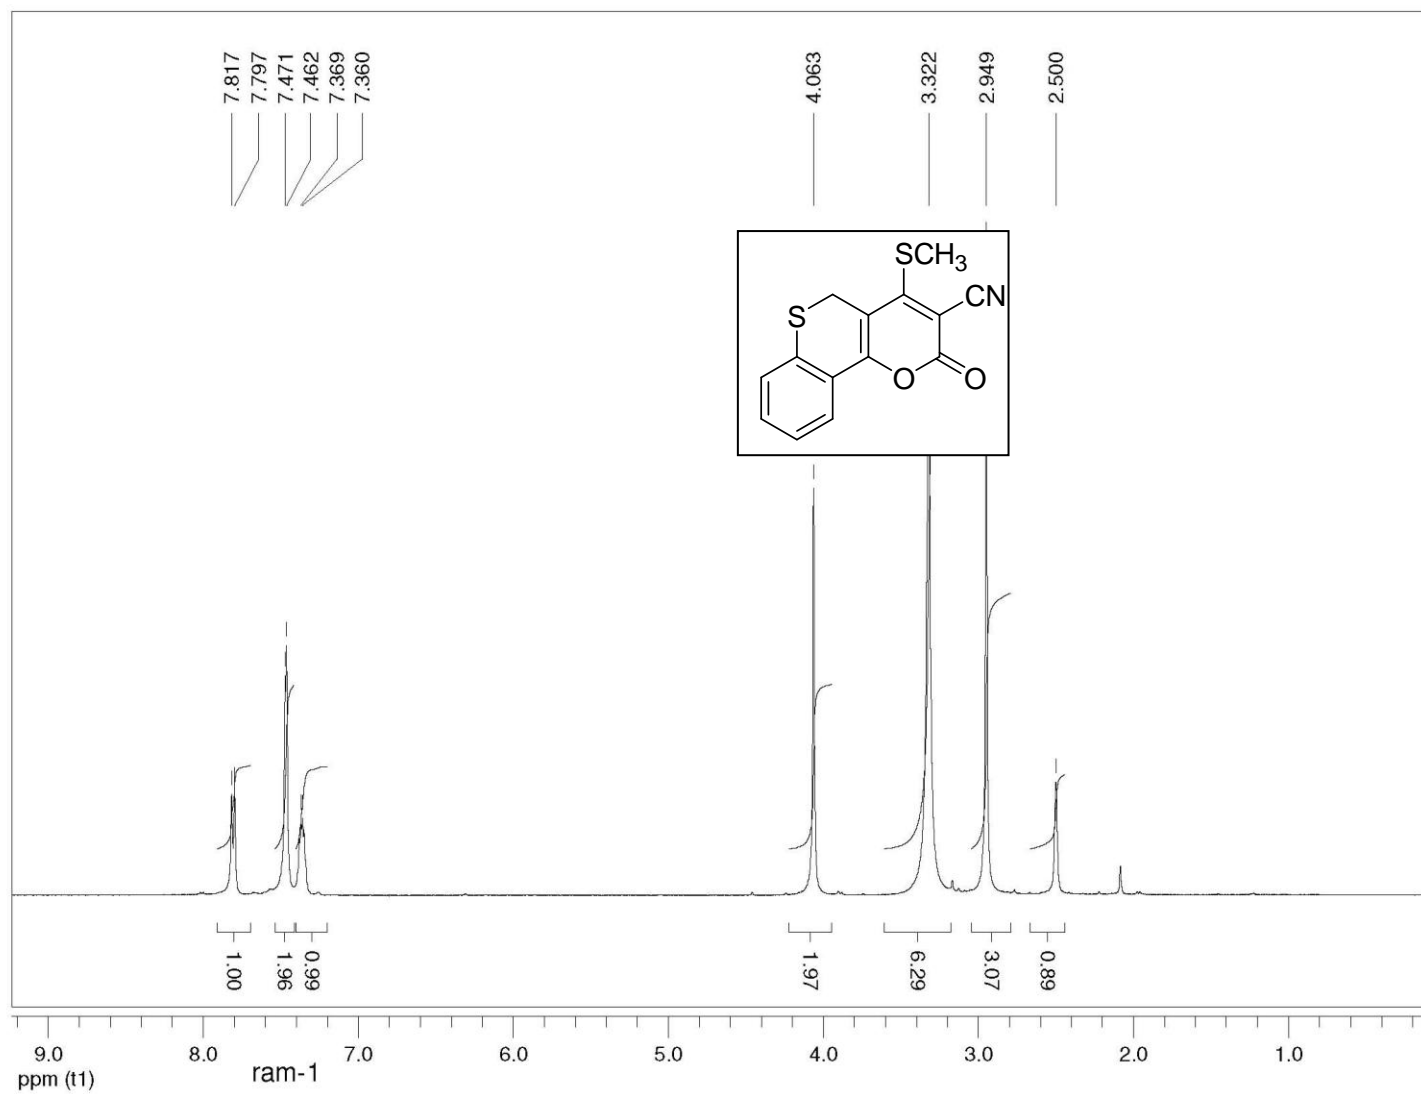

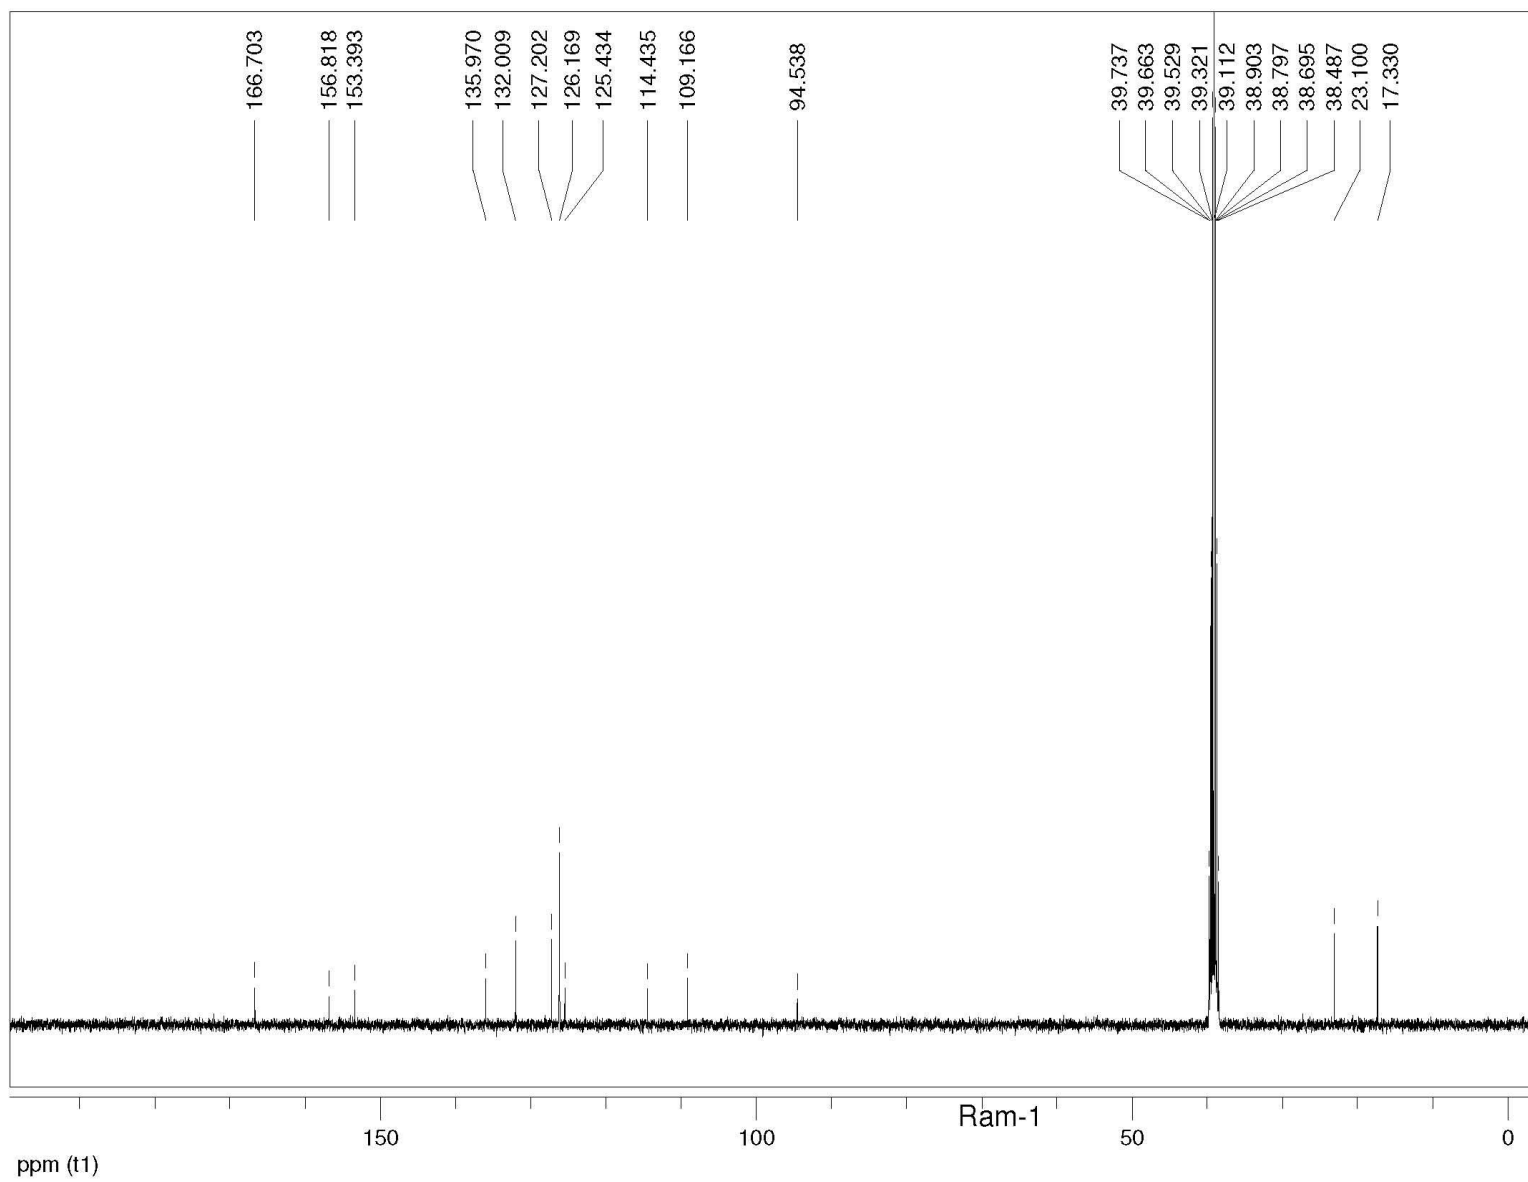

3b: 6-Chloro-1-methylsulfanyl-3-oxo-3H,10H-4-oxa-9-thiaphenanthrene-2-carbonitrile

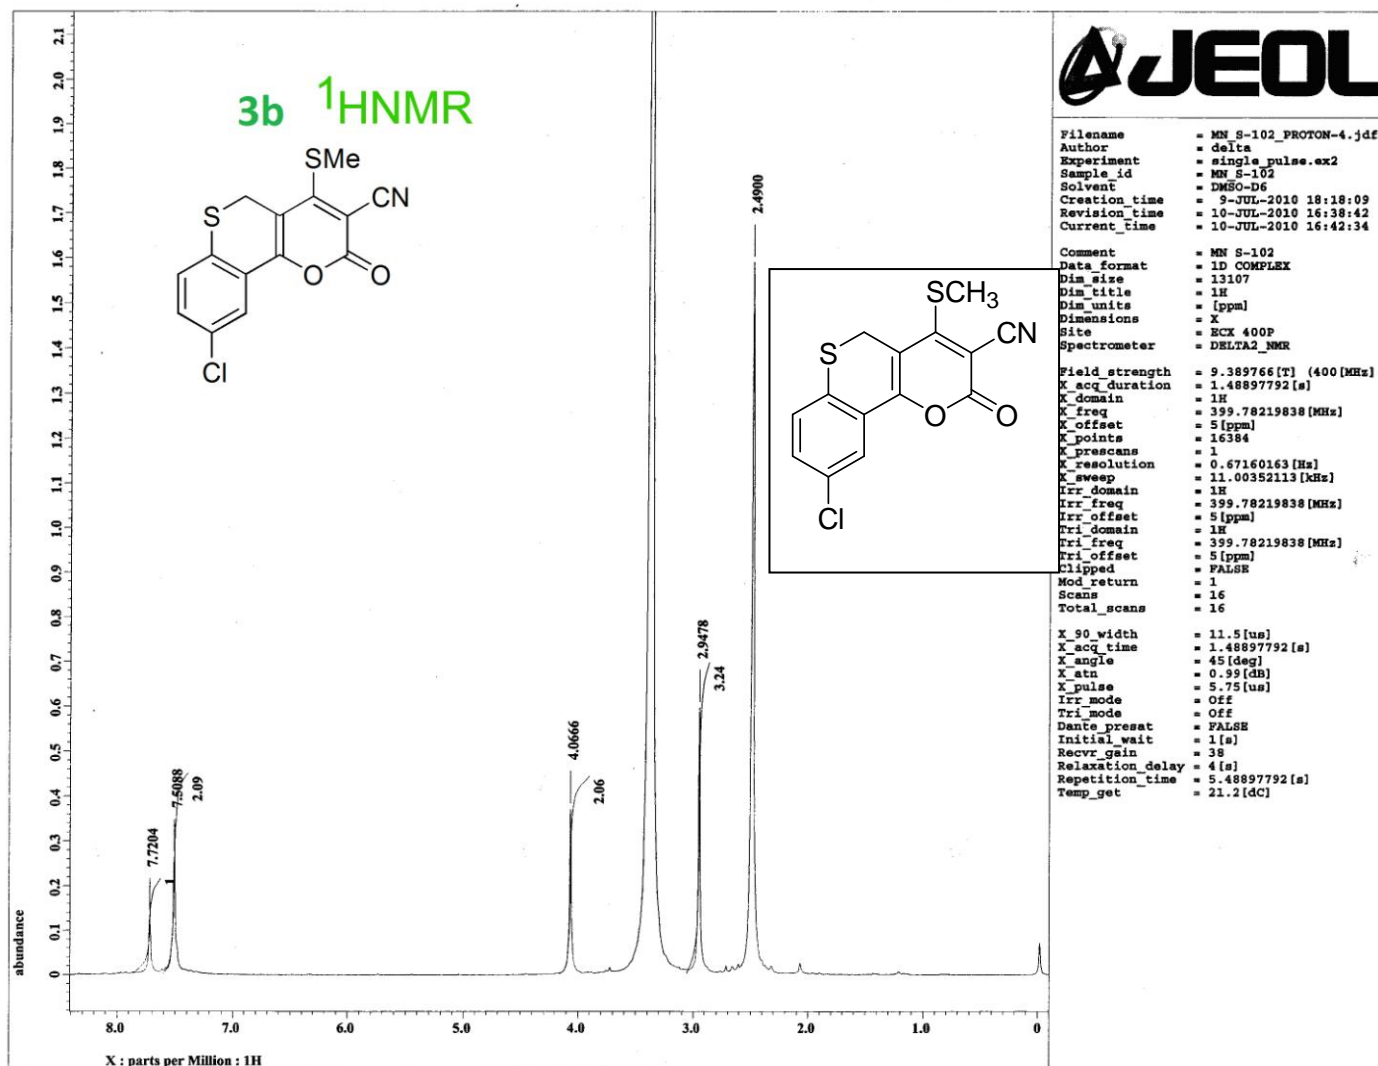

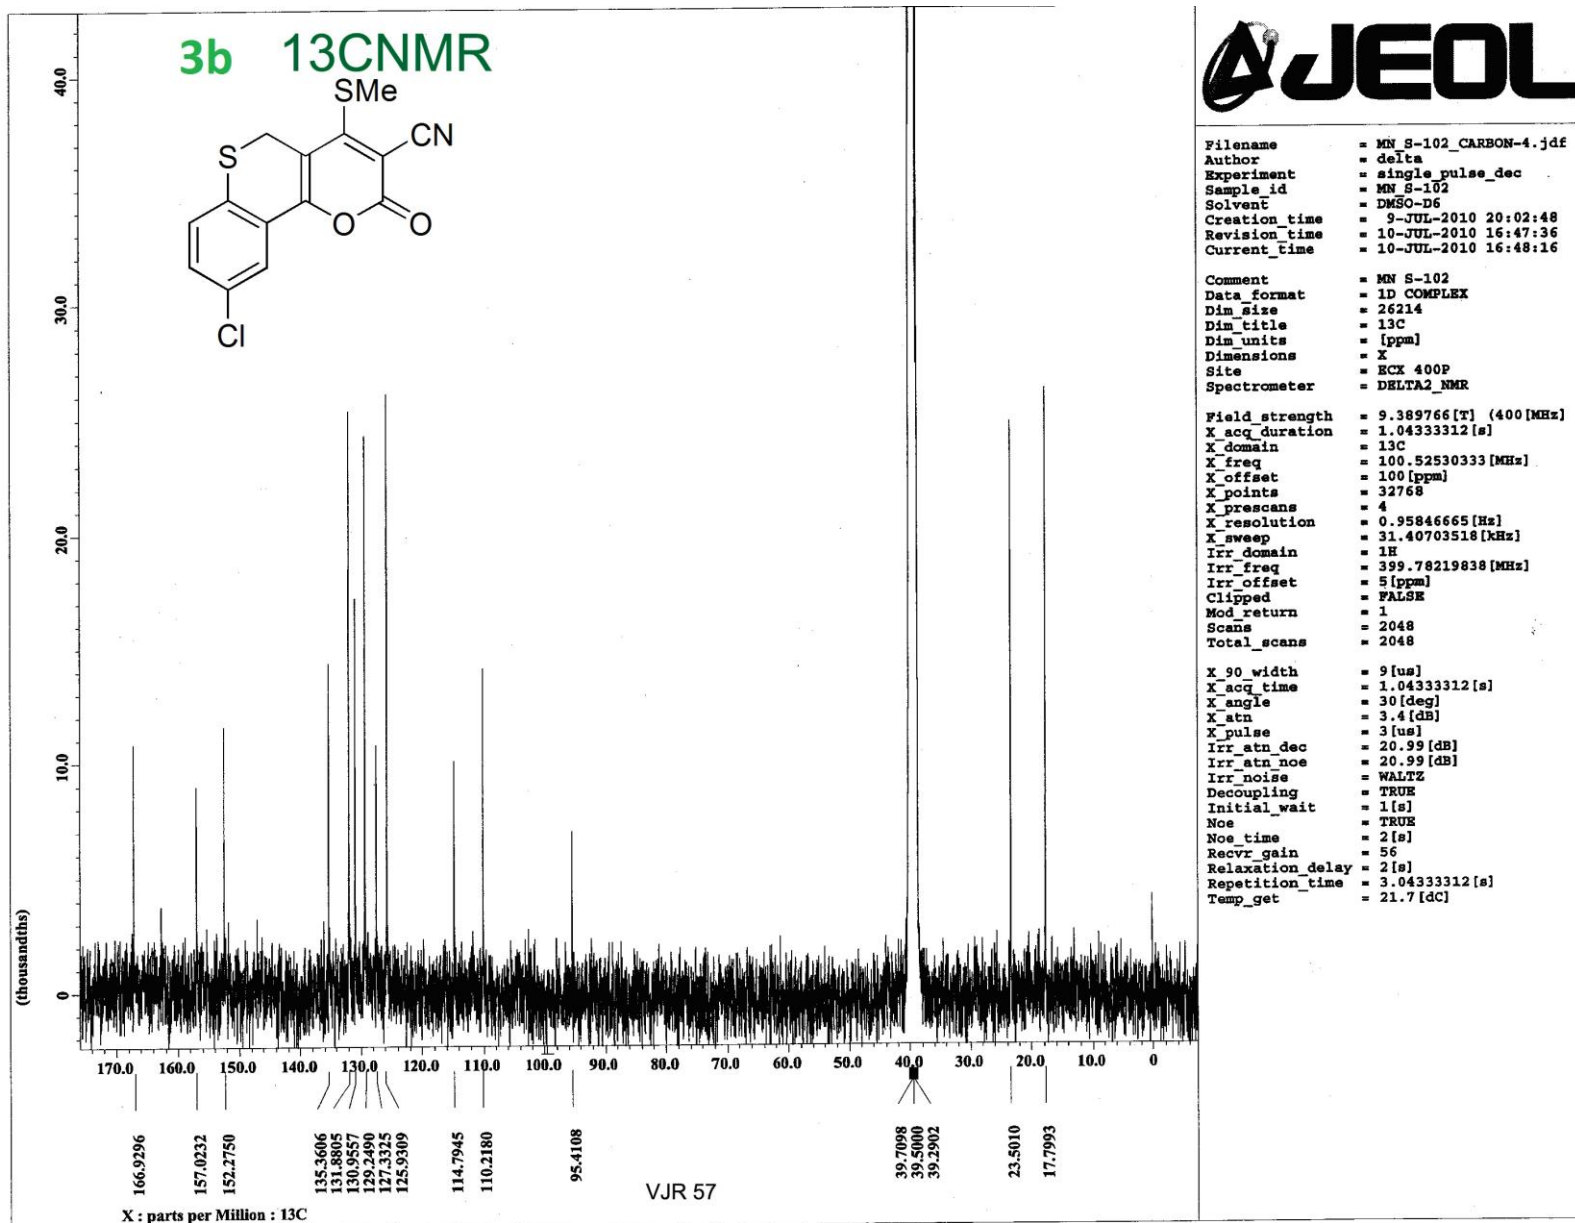

4a: 2-Oxo-4-(piperidin-1-yl)-2,5-dihydrothiopheno[4,3-b]pyran-3-carbonitrile

4c<sup>1</sup>H NMR

VJR-55

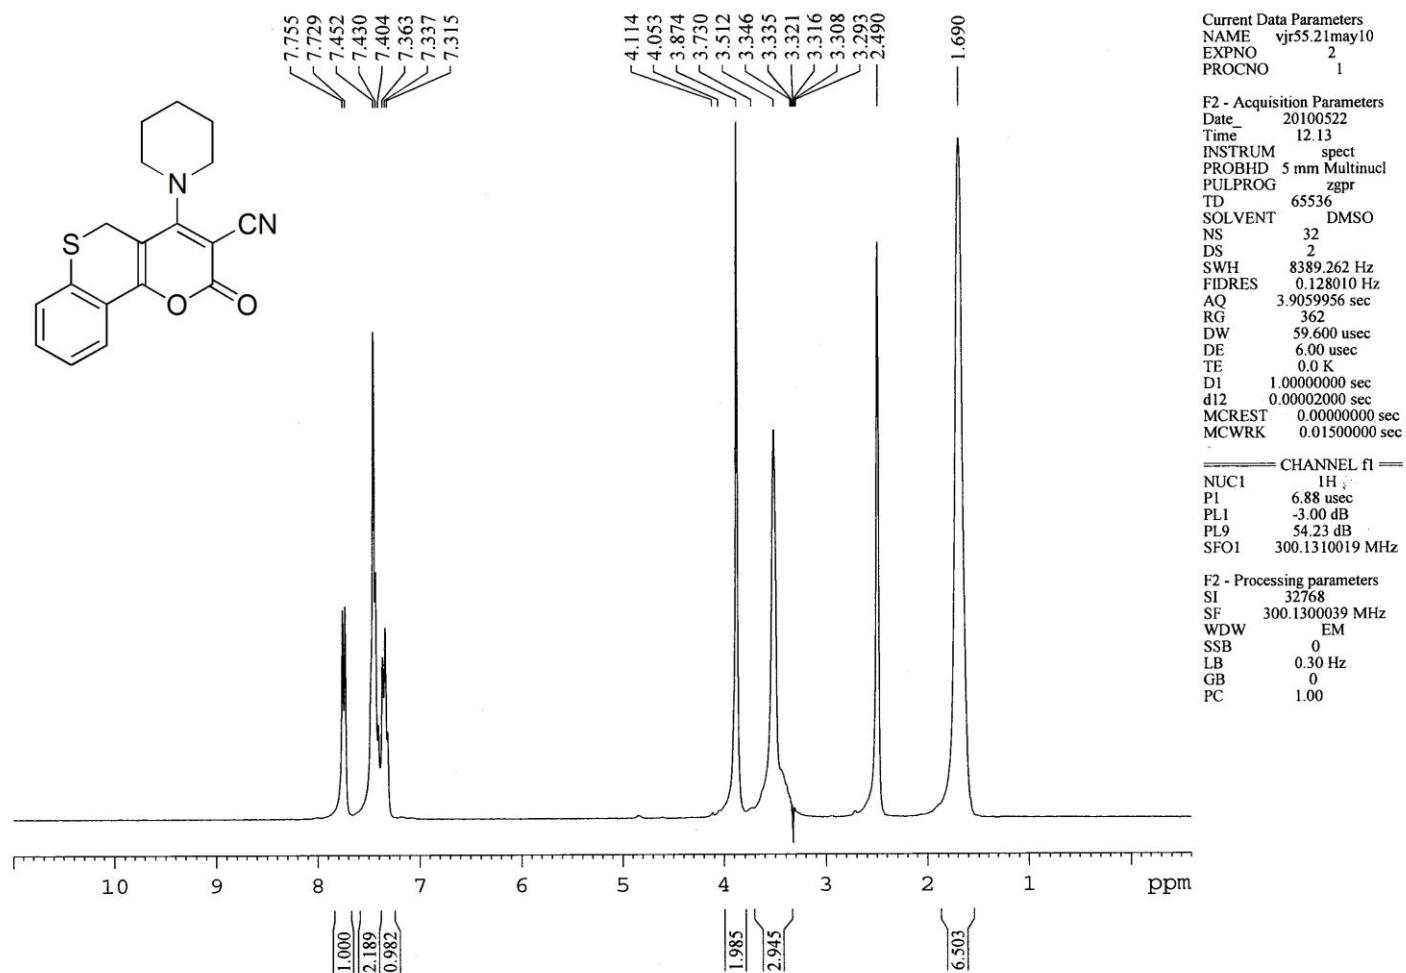

# 4C<sup>13</sup>CNMR

VJR-55

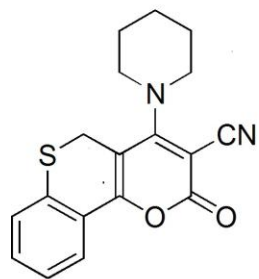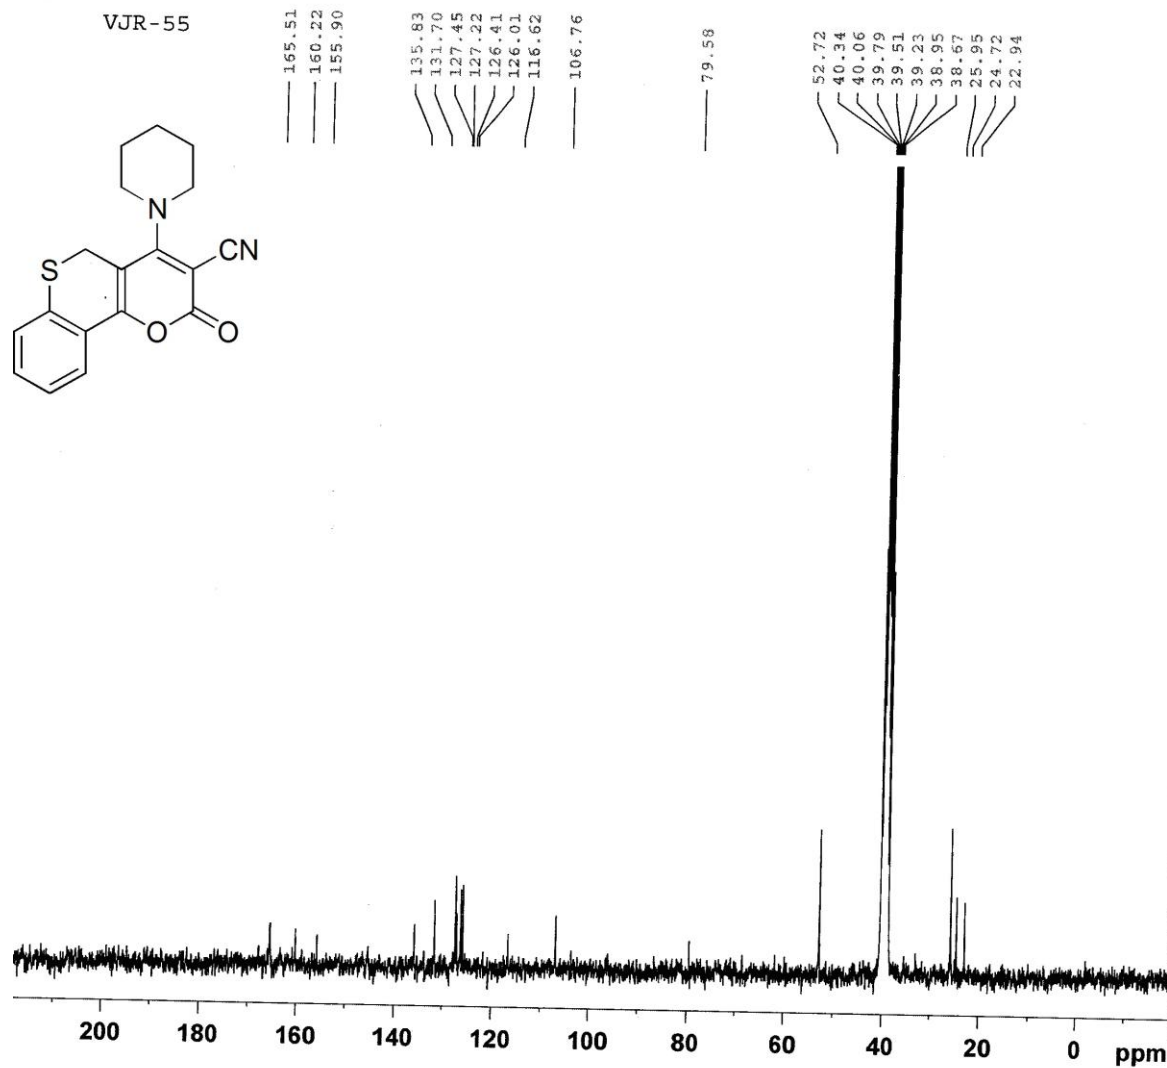

Current Data Parameters  
NAME vjr55.21may10  
EXPNO 3  
PROCNO 1

F2 - Acquisition Parameters  
Date\_ 20100522  
Time 12.19  
INSTRUM spect  
PROBHD 5 mm Multinucl  
PULPROG zgpg30  
TD 65536  
SOLVENT DMSO  
NS 1766  
DS 4  
SWH 18832.393 Hz  
FIDRES 0.287360 Hz  
AQ 1.7400308 sec  
RG 4597.6  
DW 26.550 usec  
DE 6.00 usec  
TE 0.0 K  
D1 2.0000000 sec  
d11 0.0300000 sec  
DELTA 1.8999998 sec  
MCREST 0.0000000 sec  
MCWRK 0.0150000 sec

==== CHANNEL f1 =====  
NUC1 13C  
P1 9.25 usec  
PL1 -6.00 dB  
SFO1 75.4752953 MHz

==== CHANNEL f2 =====  
CPDPRG2 waltz16  
NUC2 1H  
PCPD2 80.00 usec  
PL2 -3.00 dB  
PL12 18.31 dB  
PL13 22.00 dB  
SFO2 300.1312005 MHz

F2 - Processing parameters  
SI 32768  
SF 75.4677854 MHz  
WDW EM  
SSB 0  
LB 3.00 Hz  
GB 0  
PC 1.00

4b: 9-Chloro-2-oxo-4-(piperidin-1-yl)-2,5-dihydrothiopheno[4,3-b]pyran-3-carbonitrile

4e 1HNMR

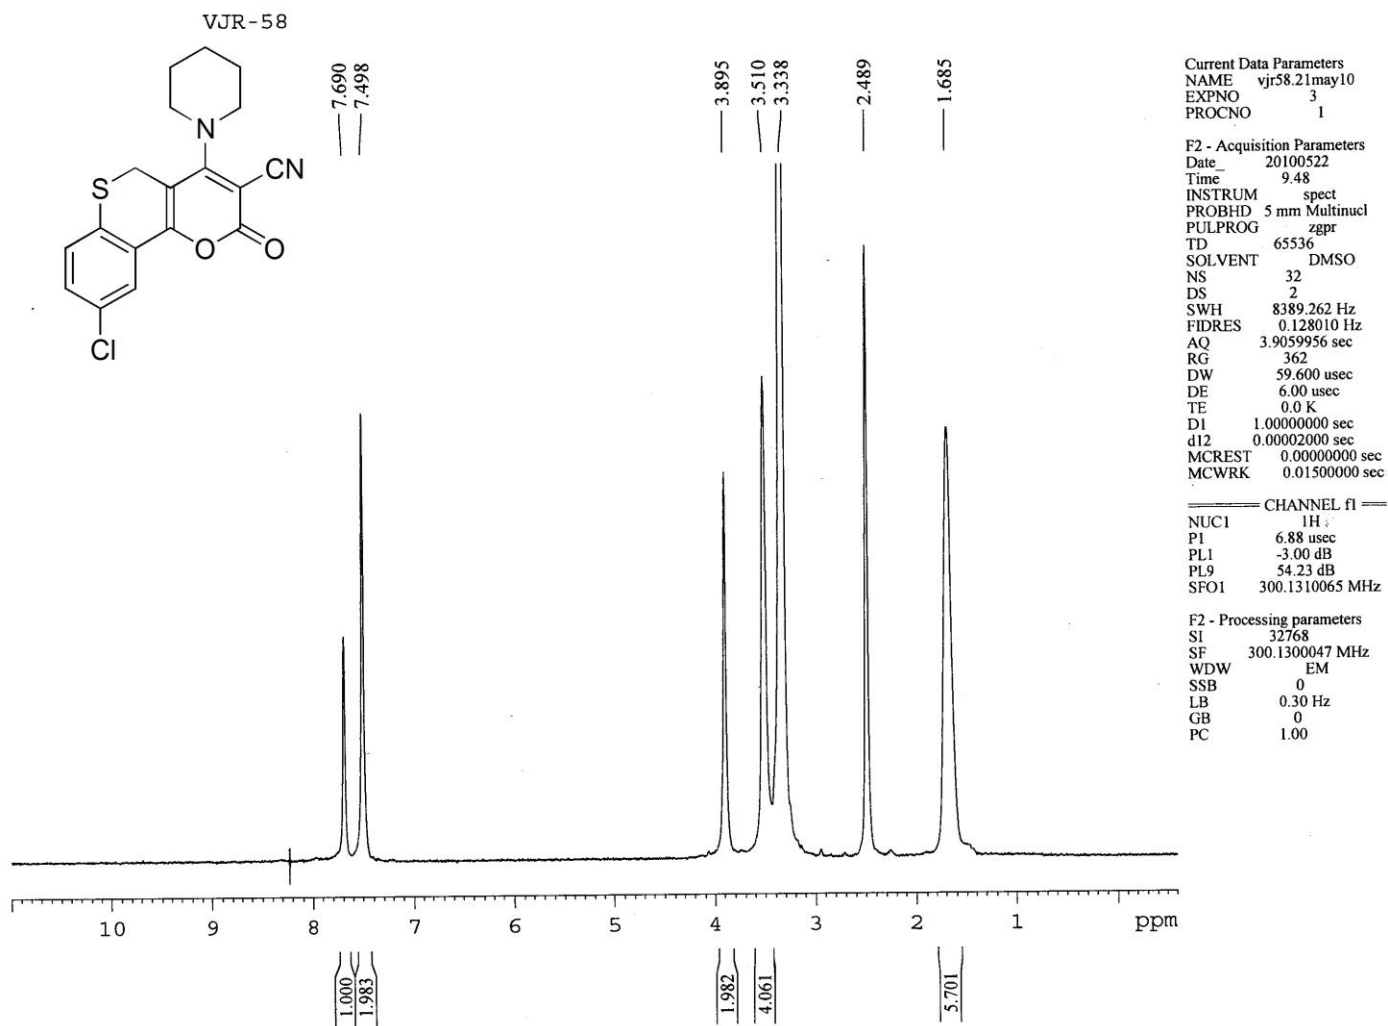



### 4e <sup>13</sup>CNMR

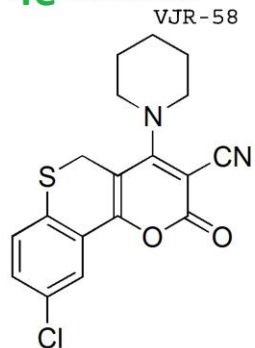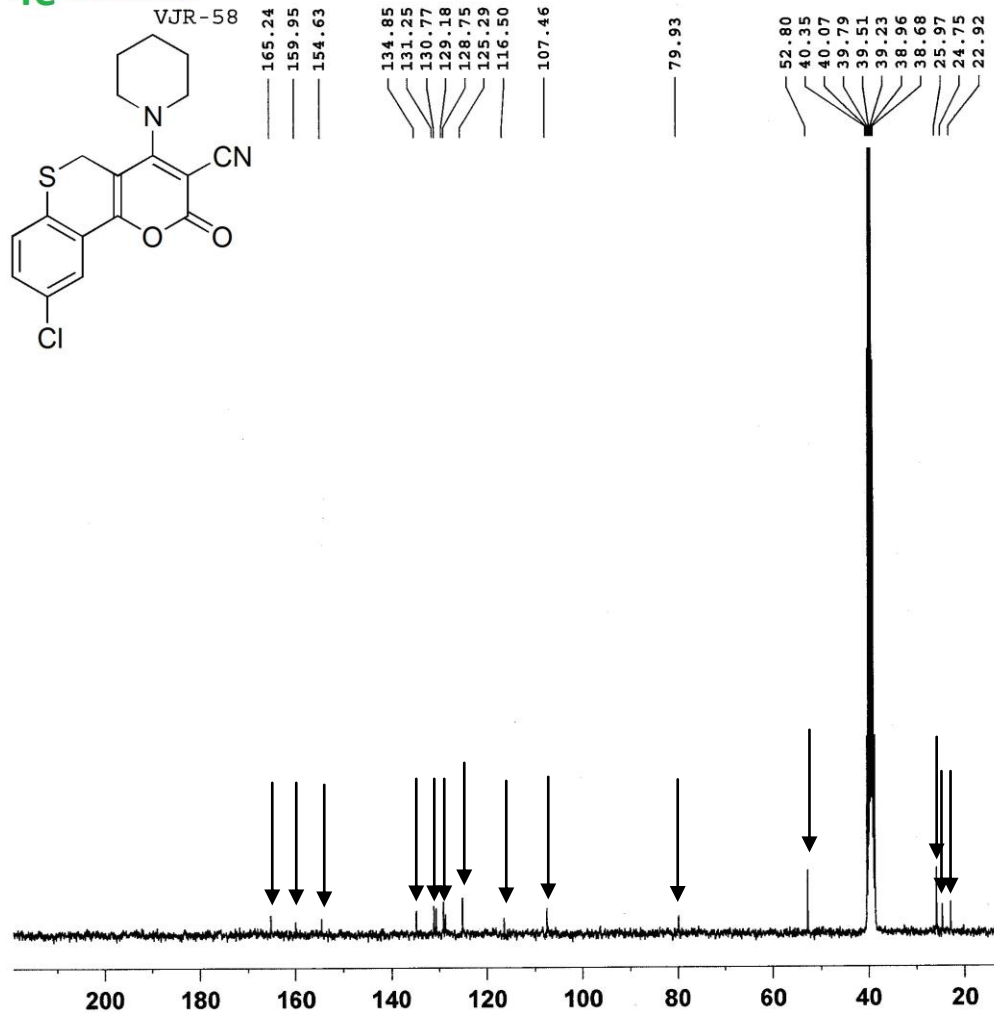

Current Data Parameters  
NAME vjr58.21may10  
EXPNO 2  
PROCNO 1

F2 - Acquisition Parameters  
Date\_ 20100522  
Time 10.02  
INSTRUM spect  
PROBHD 5 mm Multinucl  
PULPROG zgpg30  
TD 65536  
SOLVENT DMSO  
NS 2113  
DS 4  
SWH 18832.393 Hz  
FIDRES 0.287360 Hz  
AQ 1.7400308 sec  
RG 7298.2  
DW 26.550 usec  
DE 6.00 usec  
TE 0.0 K  
D1 2.0000000 sec  
d11 0.0300000 sec  
DELTA 1.89999998 sec  
MCREST 0.0000000 sec  
MCWRK 0.0150000 sec

===== CHANNEL f1 =====  
NUC1 13C  
P1 9.25 usec  
PL1 -6.00 dB  
SFO1 75.4752953 MHz

===== CHANNEL f2 =====  
CPDPRG2 waltz16  
NUC2 1H  
PCPD2 80.00 usec  
PL2 -3.00 dB  
PL12 18.31 dB  
PL13 22.00 dB  
SFO2 300.1312005 MHz

F2 - Processing parameters  
SI 32768  
SF 75.4677836 MHz  
WDW EM  
SSB 0  
LB 3.00 Hz  
GB 0  
PC 1.00

#### 4c: 4-Morpholino-2-oxo-2,5-dihydrothiopheno[4,3-b]pyran-3-carbonitrile

VJR-56

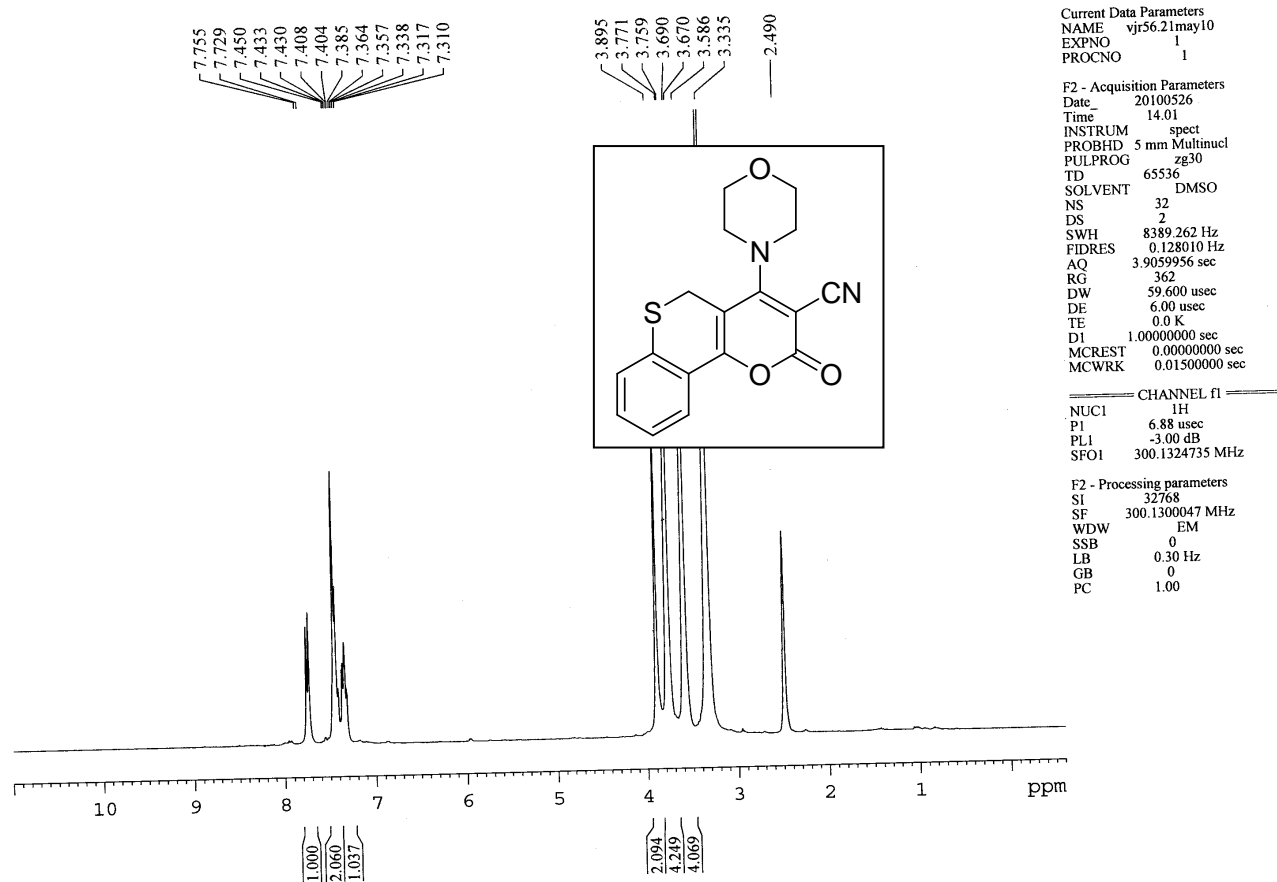

VJR-56

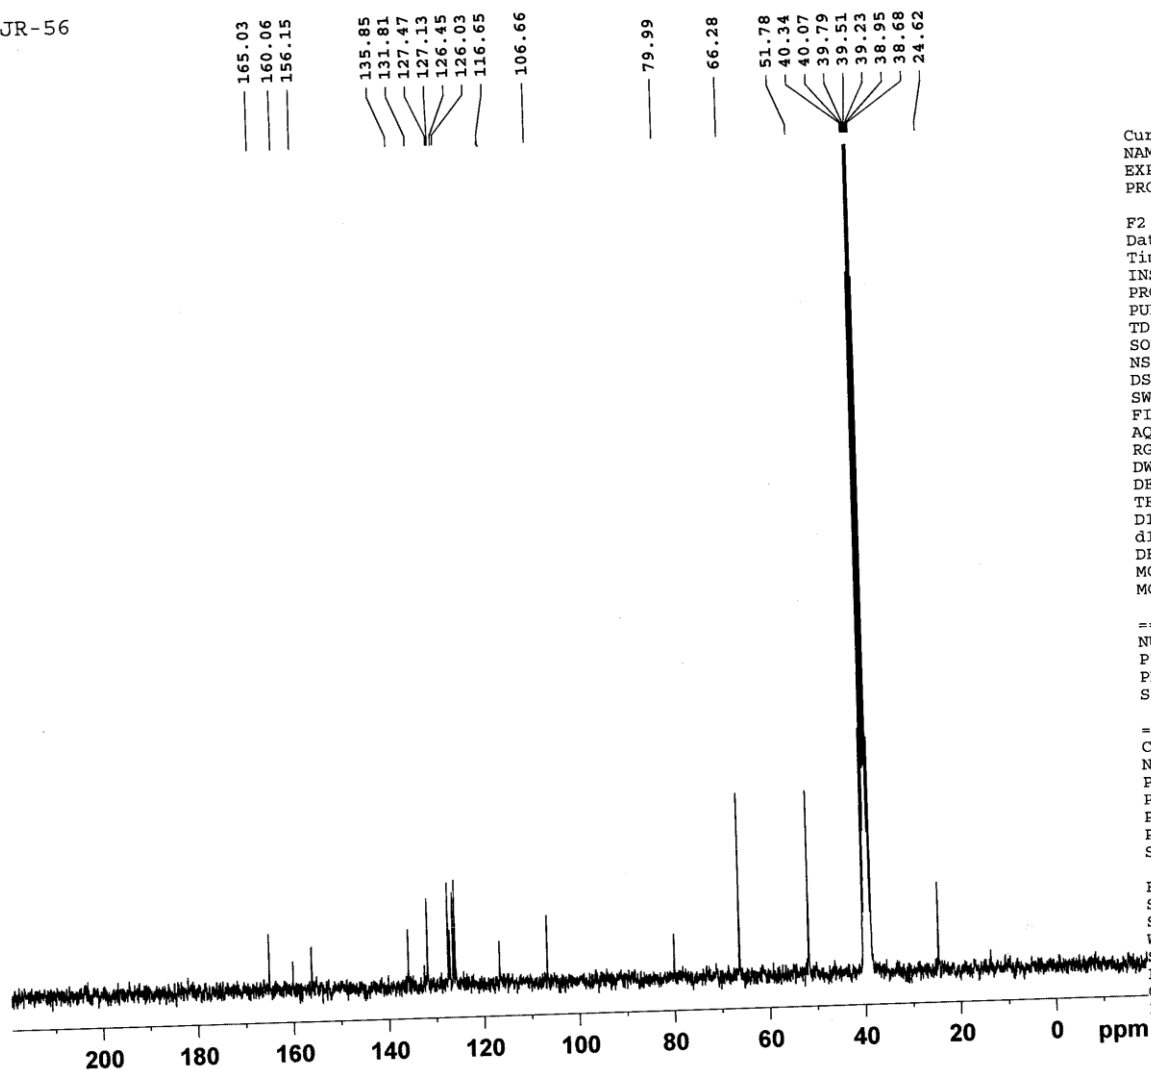

Current Data Parameters  
NAME vjr56.21may10  
EXPNO 2  
PROCNO 1

F2 - Acquisition Parameters  
Date\_ 20100526  
Time\_ 14.11  
INSTRUM spect  
PROBHD 5 mm Multinucl  
PULPROG zgpg30  
TD 65536  
SOLVENT DMSO  
NS 1206  
DS 4  
SWH 18832.393 Hz  
FIDRES 0.287360 Hz  
AQ 1.7400308 sec  
RG 8192  
DW 26.550 usec  
DE 6.00 usec  
TE 0.0 K  
D1 2.00000000 sec  
d11 0.03000000 sec  
DELTA 1.89999998 sec  
MCREST 0.00000000 sec  
MCWRK 0.01500000 sec

==== CHANNEL f1 =====  
NUC1 13C  
P1 9.25 usec  
PL1 -6.00 dB  
SFO1 75.4752953 MHz

==== CHANNEL f2 =====  
CPDPRG2 waltz16  
NUC2 1H  
PCPD2 80.00 usec  
PL2 -3.00 dB  
PL12 18.31 dB  
PL13 22.00 dB  
SFO2 300.1312005 MHz

F2 - Processing parameters  
SI 32768  
SF 75.4677848 MHz  
WDW EM  
SSB 0  
LB 3.00 Hz  
GB 0  
PC 1.00

**4d: 9-Chloro-4-morpholino-2-oxo-2,5-dihydrothiochromeno[4,3-b]pyran-3-carbonitrile**

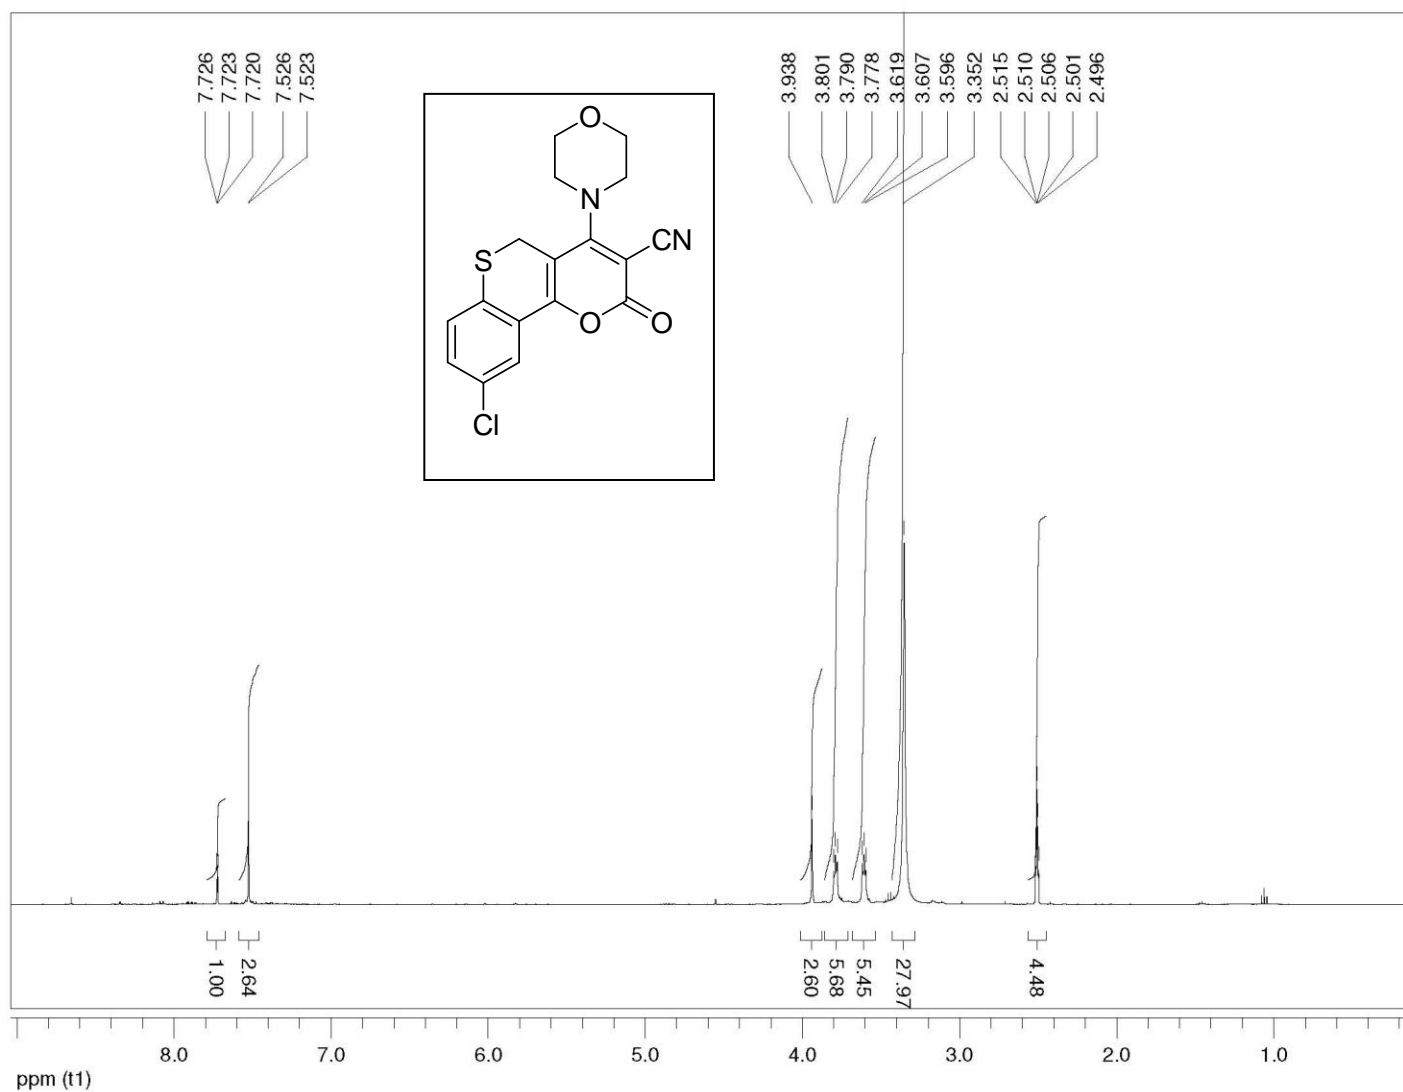

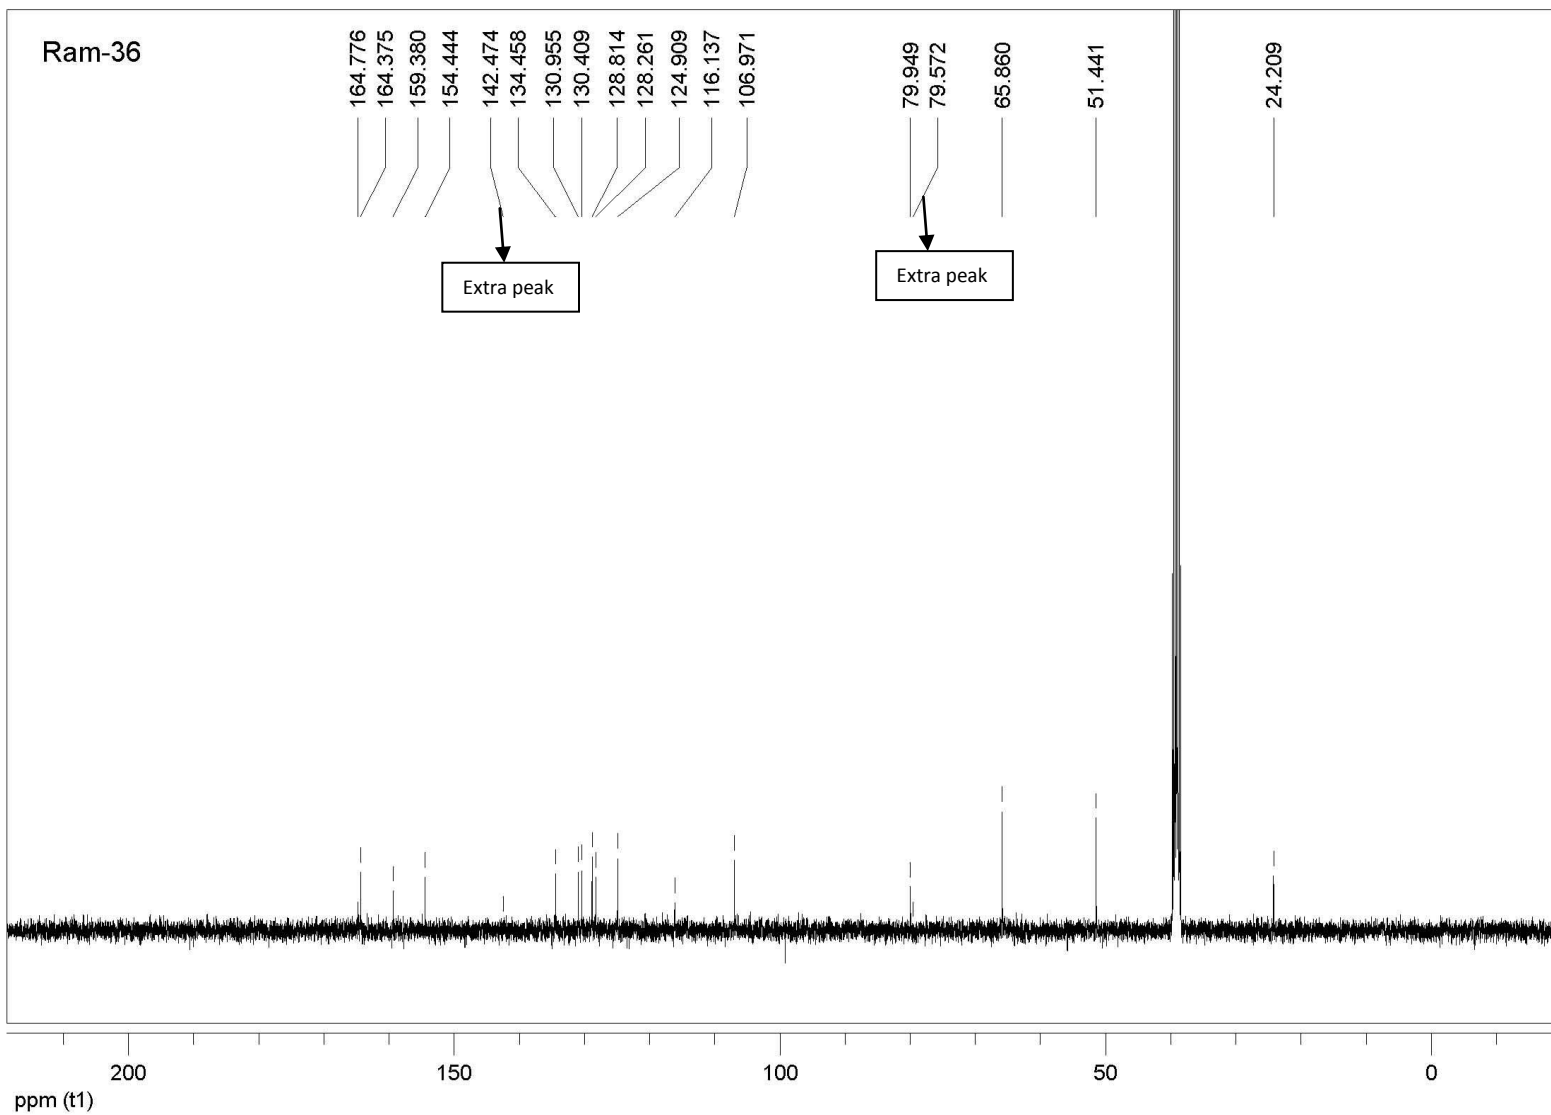

**4e: 2-Oxo-4-(pyrrolidin-1-yl)-2,5-dihydrothiopheno[4,3-b]pyran-3-carbonitrile**

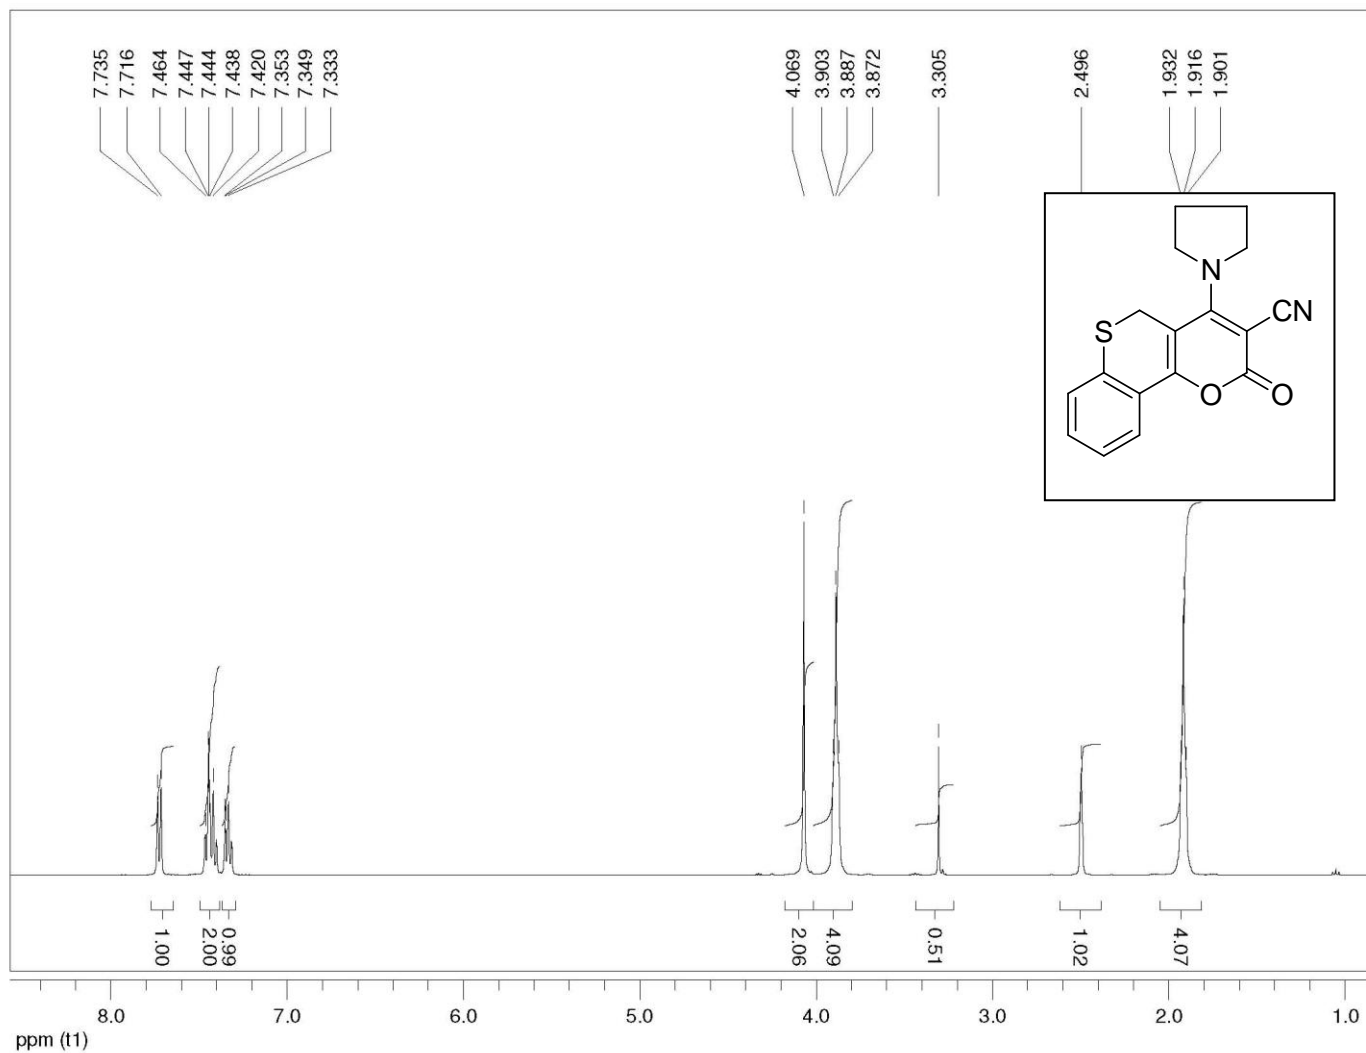

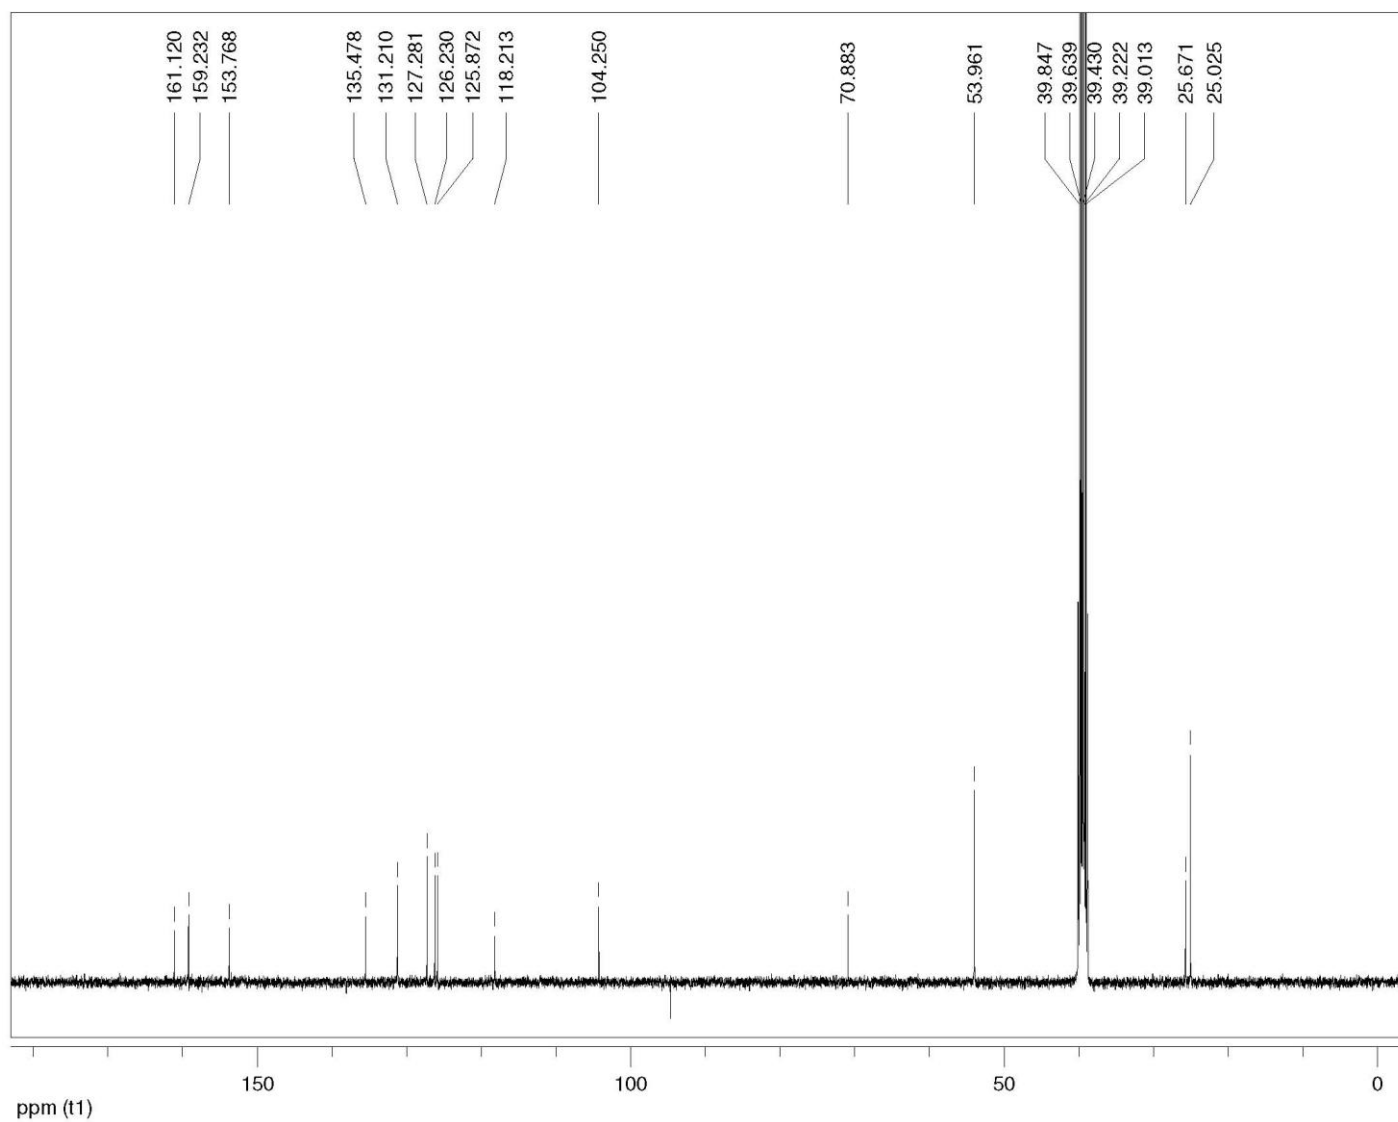

6a: (Z)-2-(5,6-Dihydrobenzo[f]thiochromeno[3,4-c]chromen-3(2H)-ylidene)acetonitrile

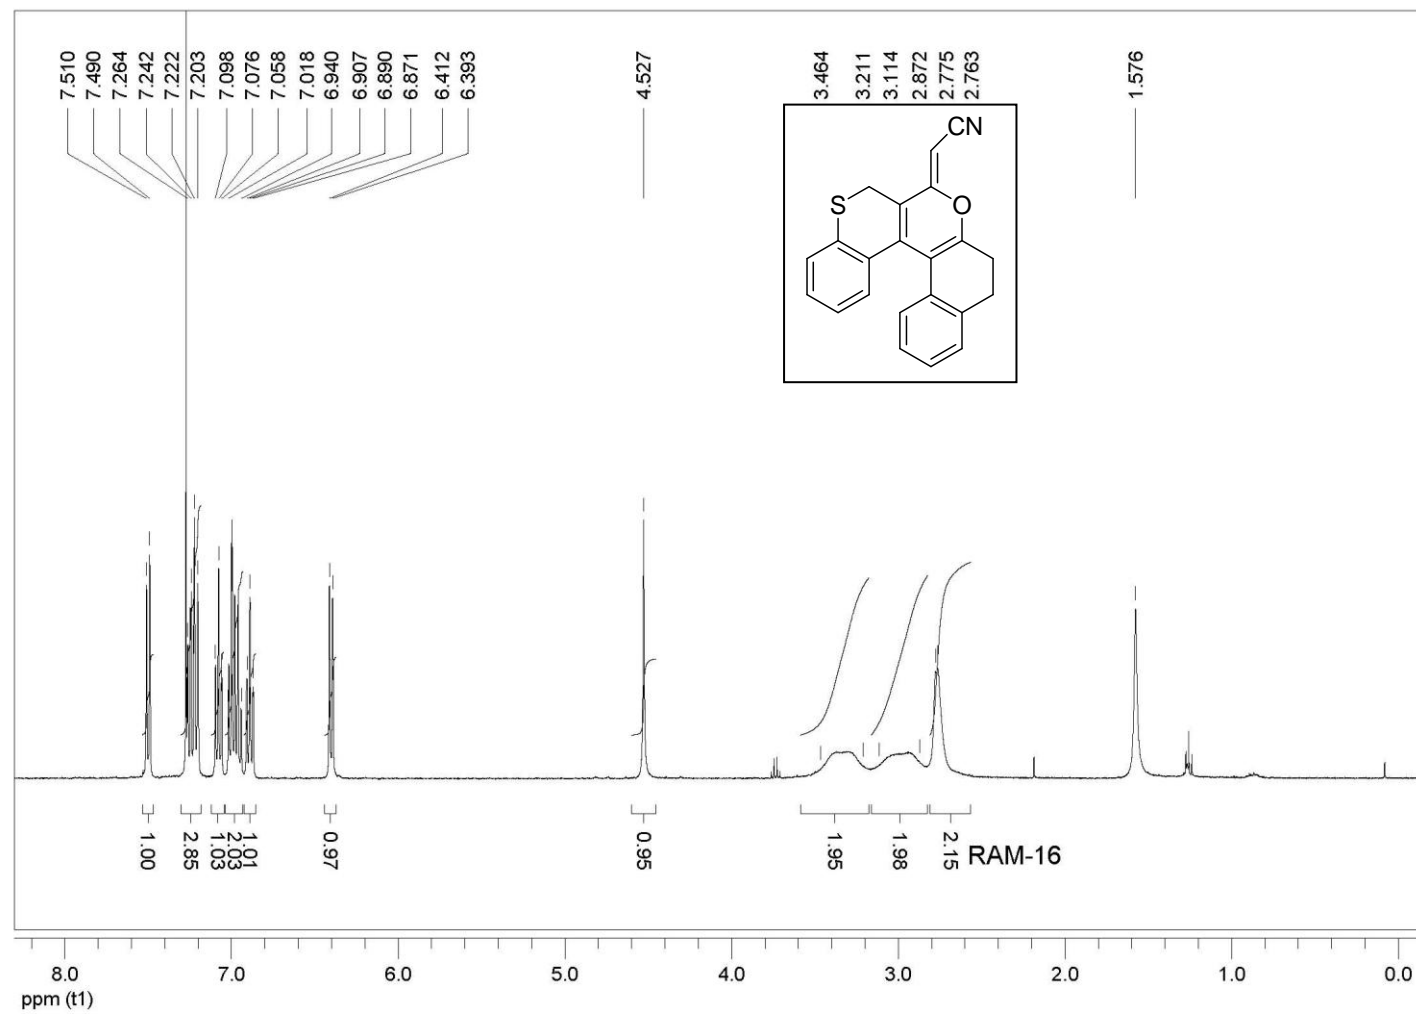



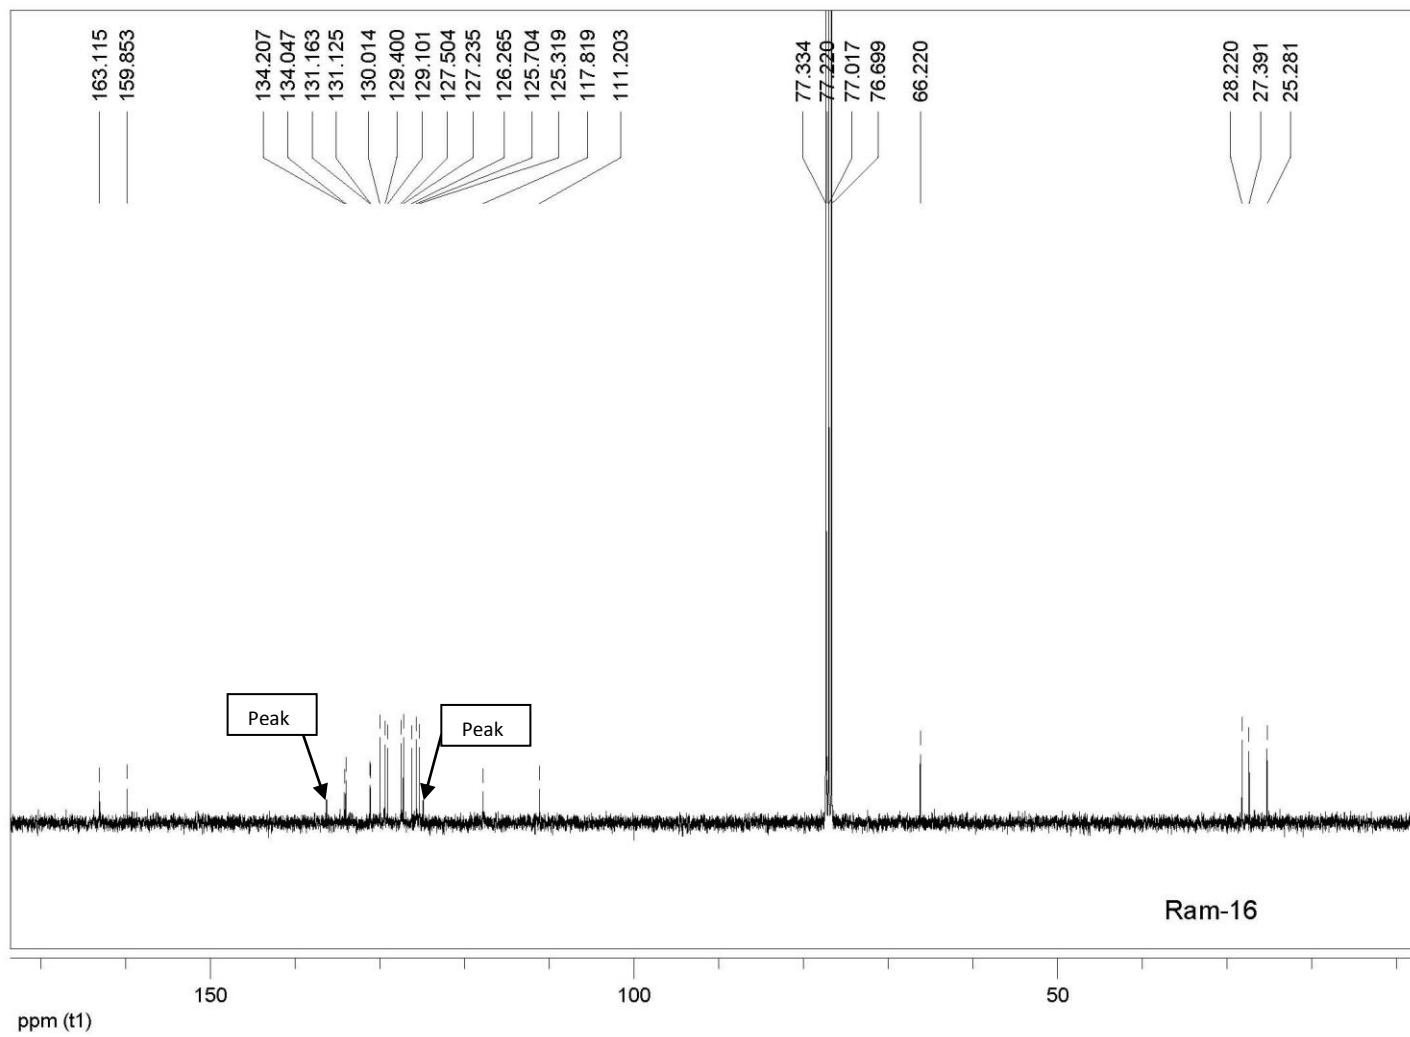

6b: (Z)-2-(12-Chloro-5,6-dihydrobenzo[f]thiochromeno[3,4-c]chromen-3(2H)-ylidene)- acetonitrile

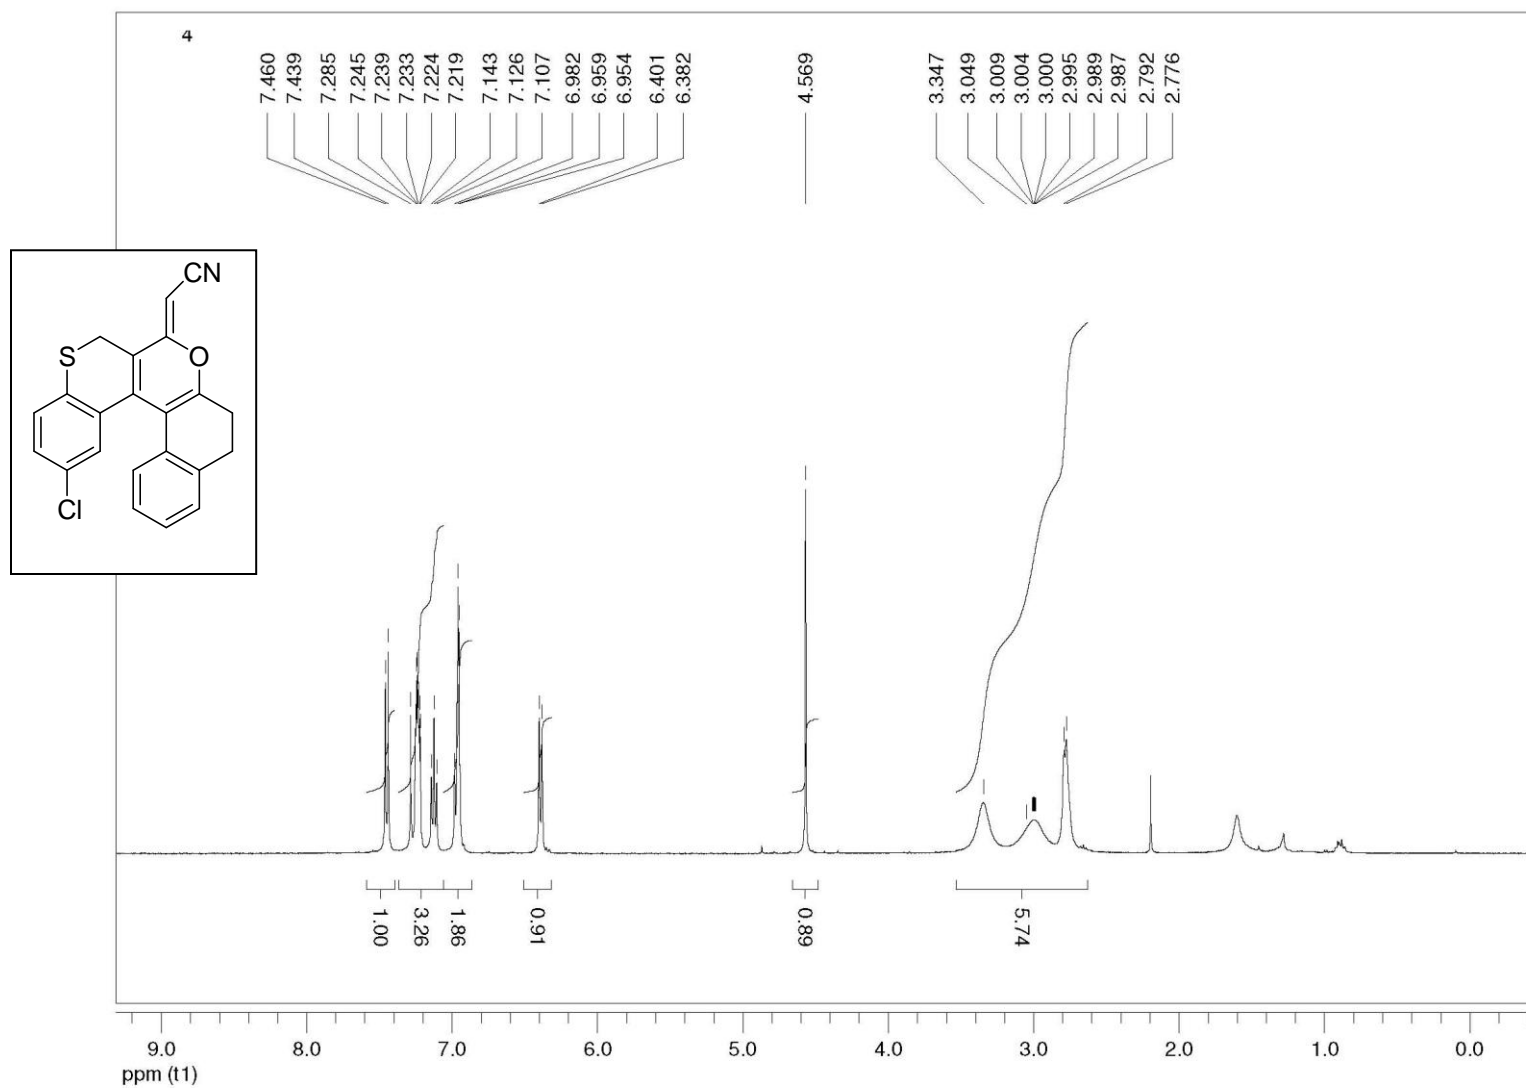

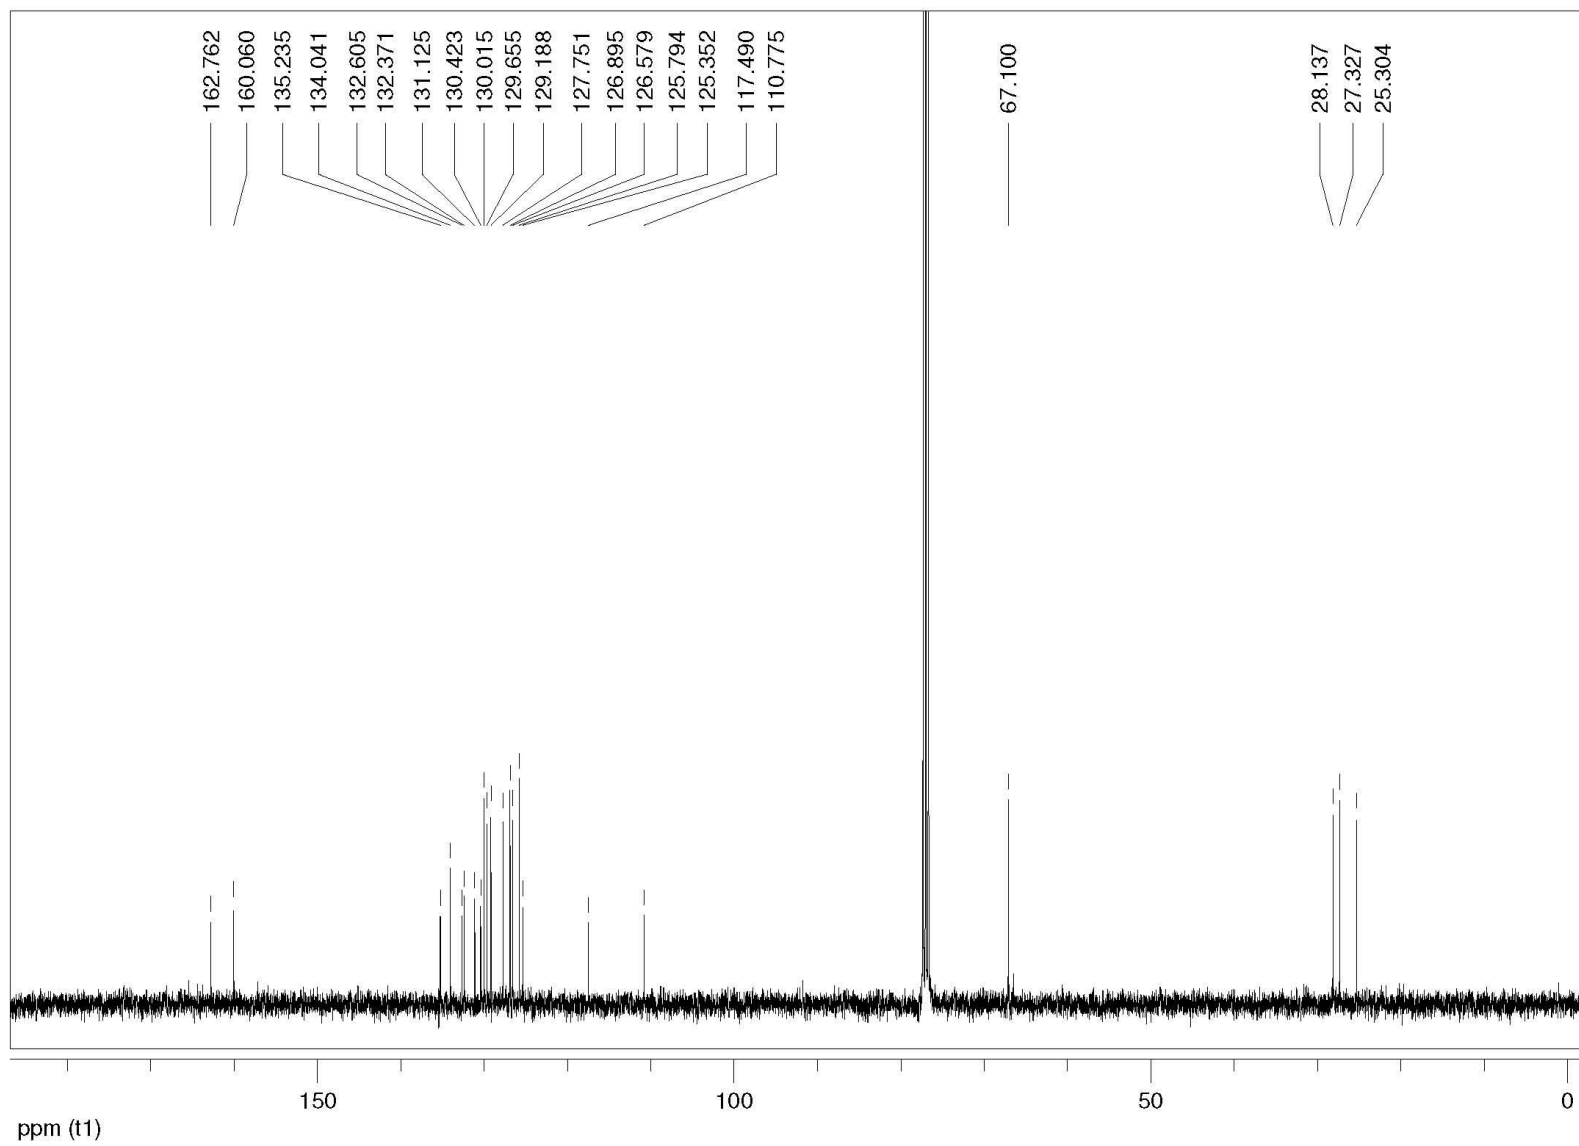

6c: (Z)-2-(8-Methoxy-5,6-dihydrobenzo[f]thiochromeno[3,4-c]chromen-3(2H)-ylidene)acetonitrile

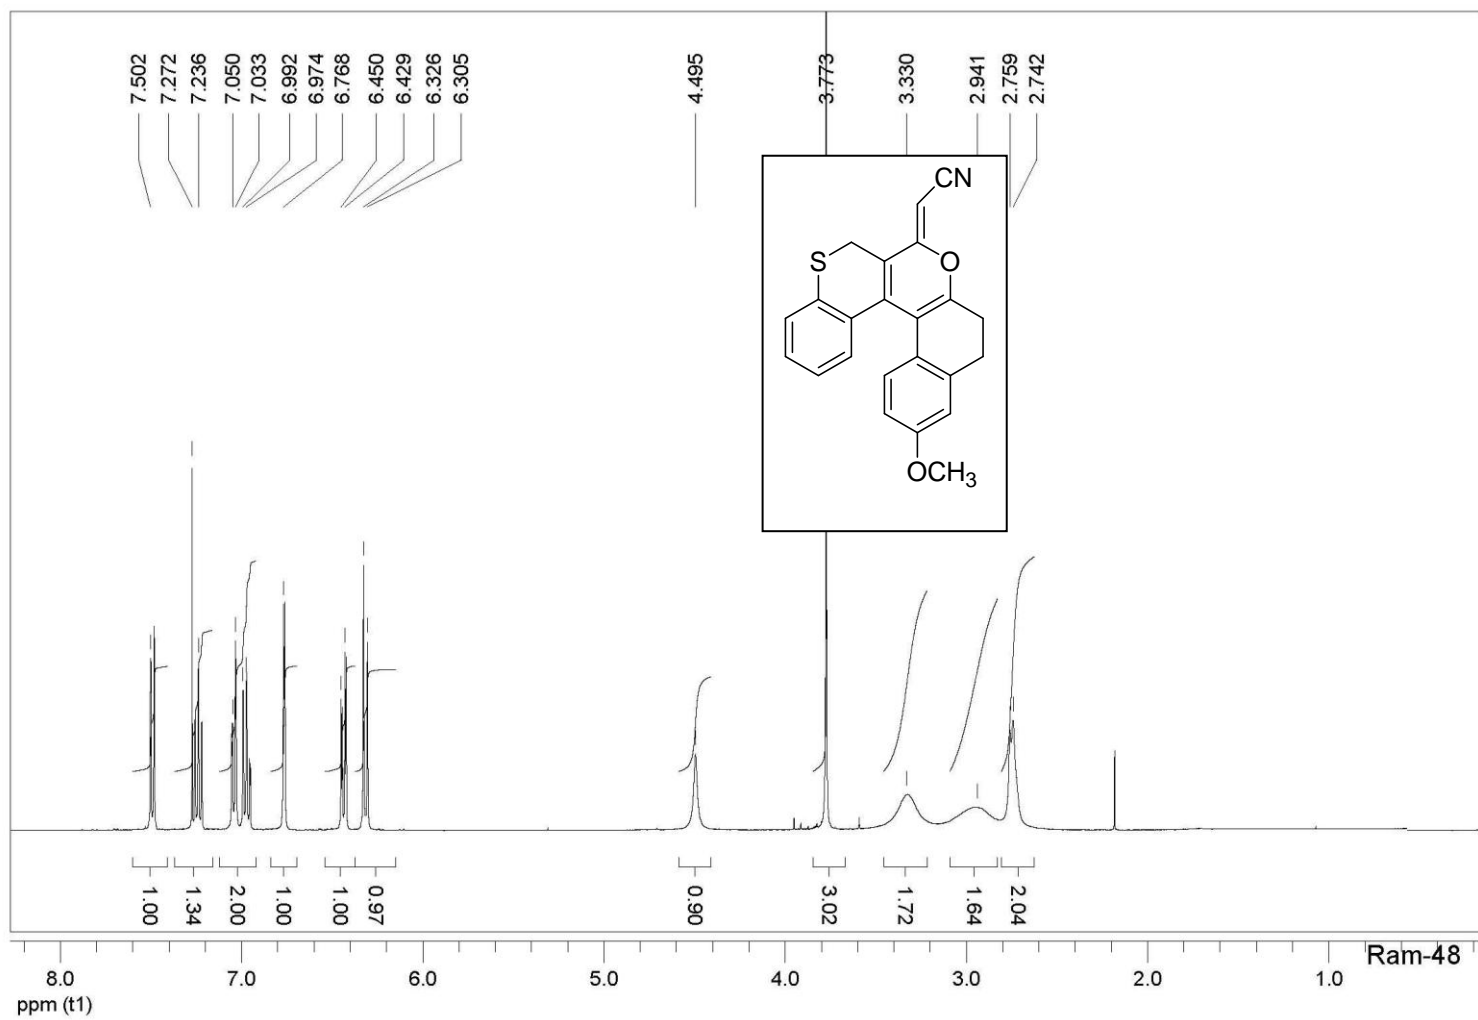

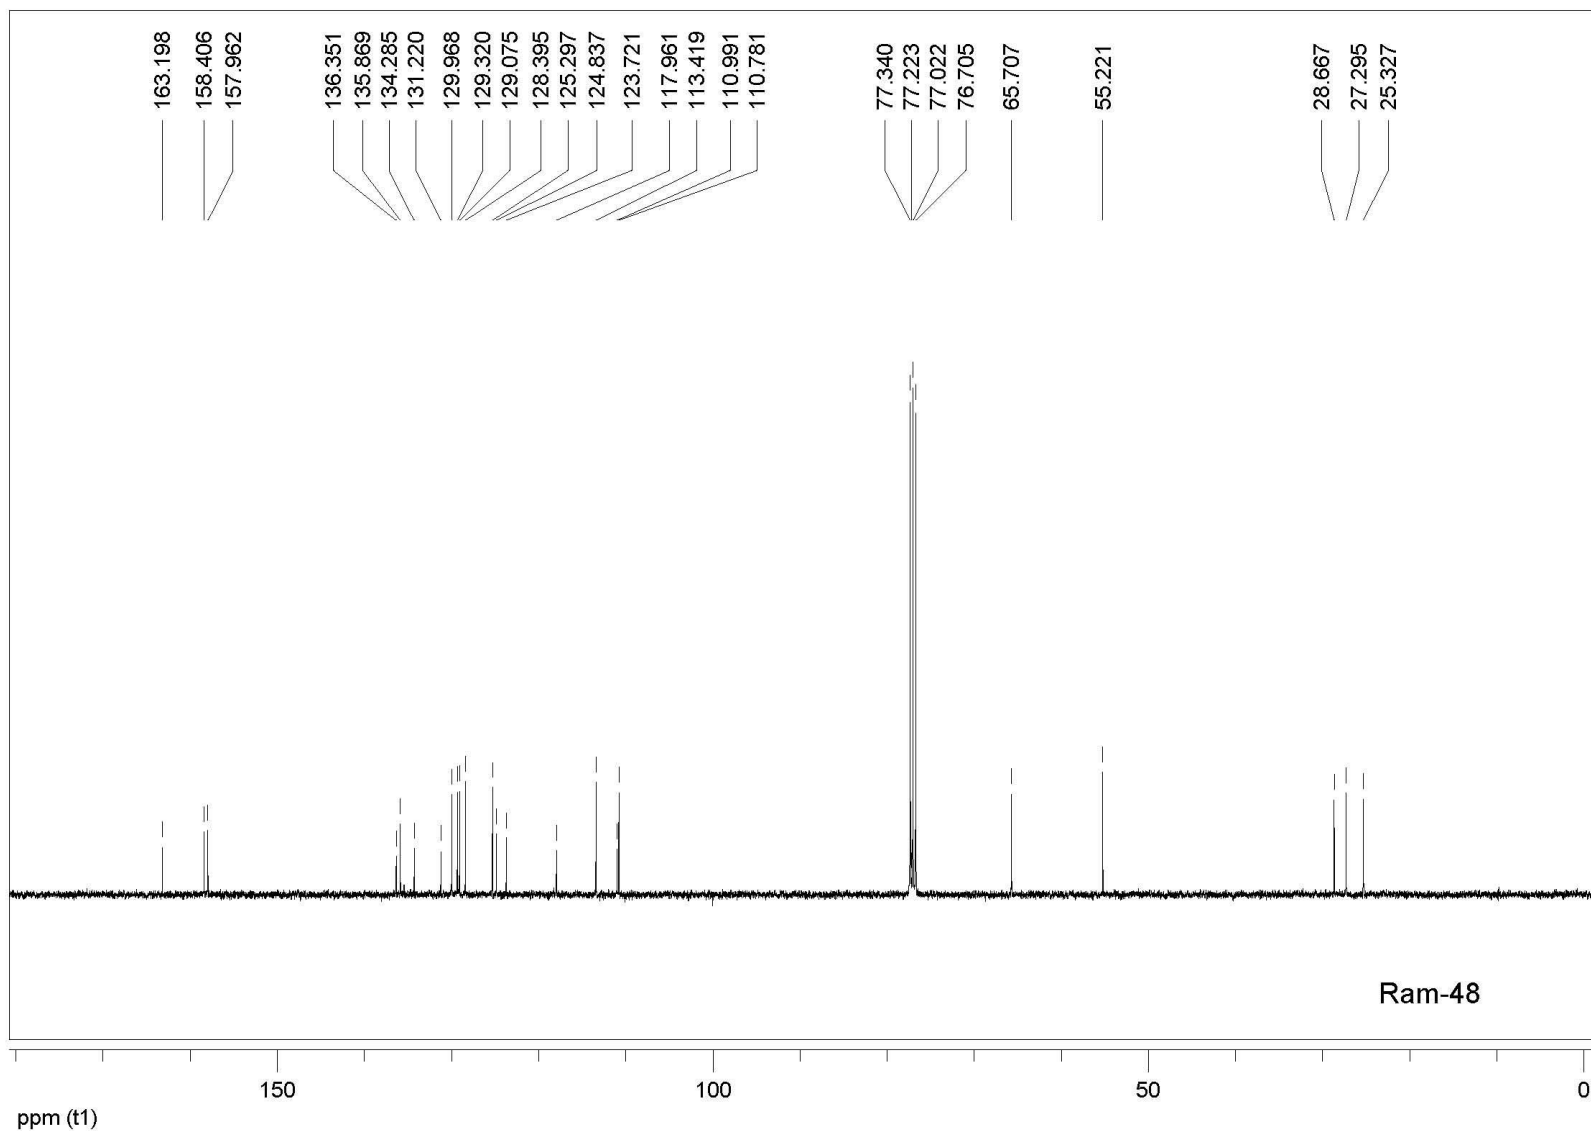

6d: (Z)-2-(12-Chloro-8-methoxy-5,6-dihydrobenzo[f]thiochromeno[3,4-c]chromen-3(2H)-ylidene)acetonitrile

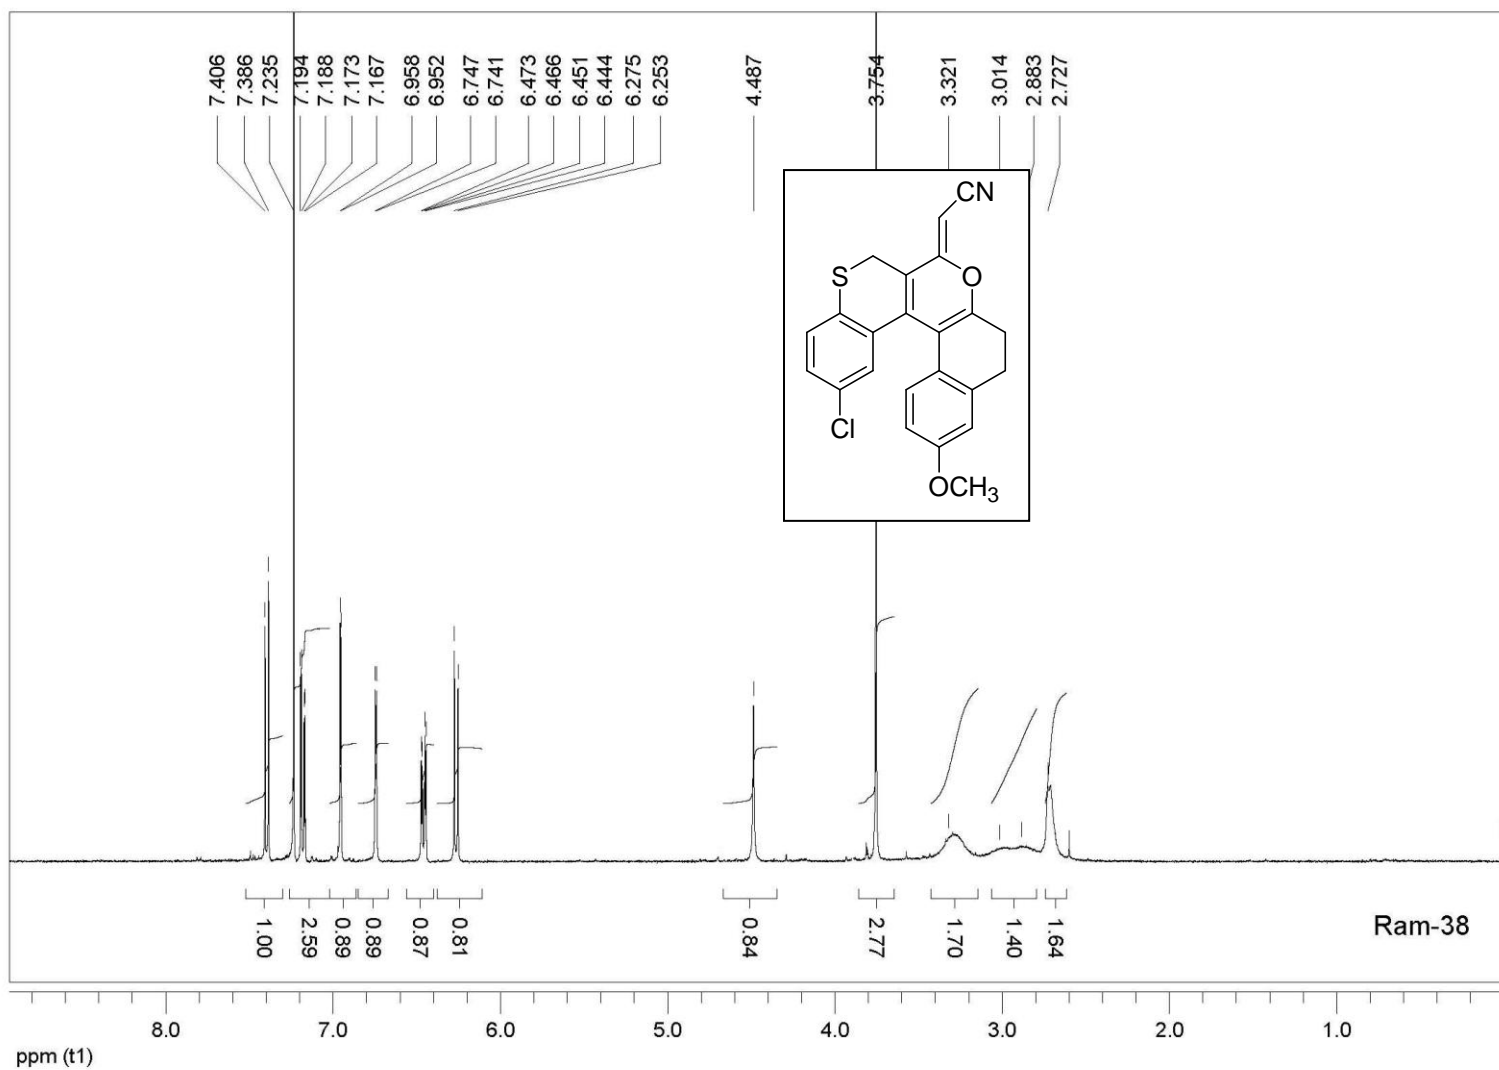

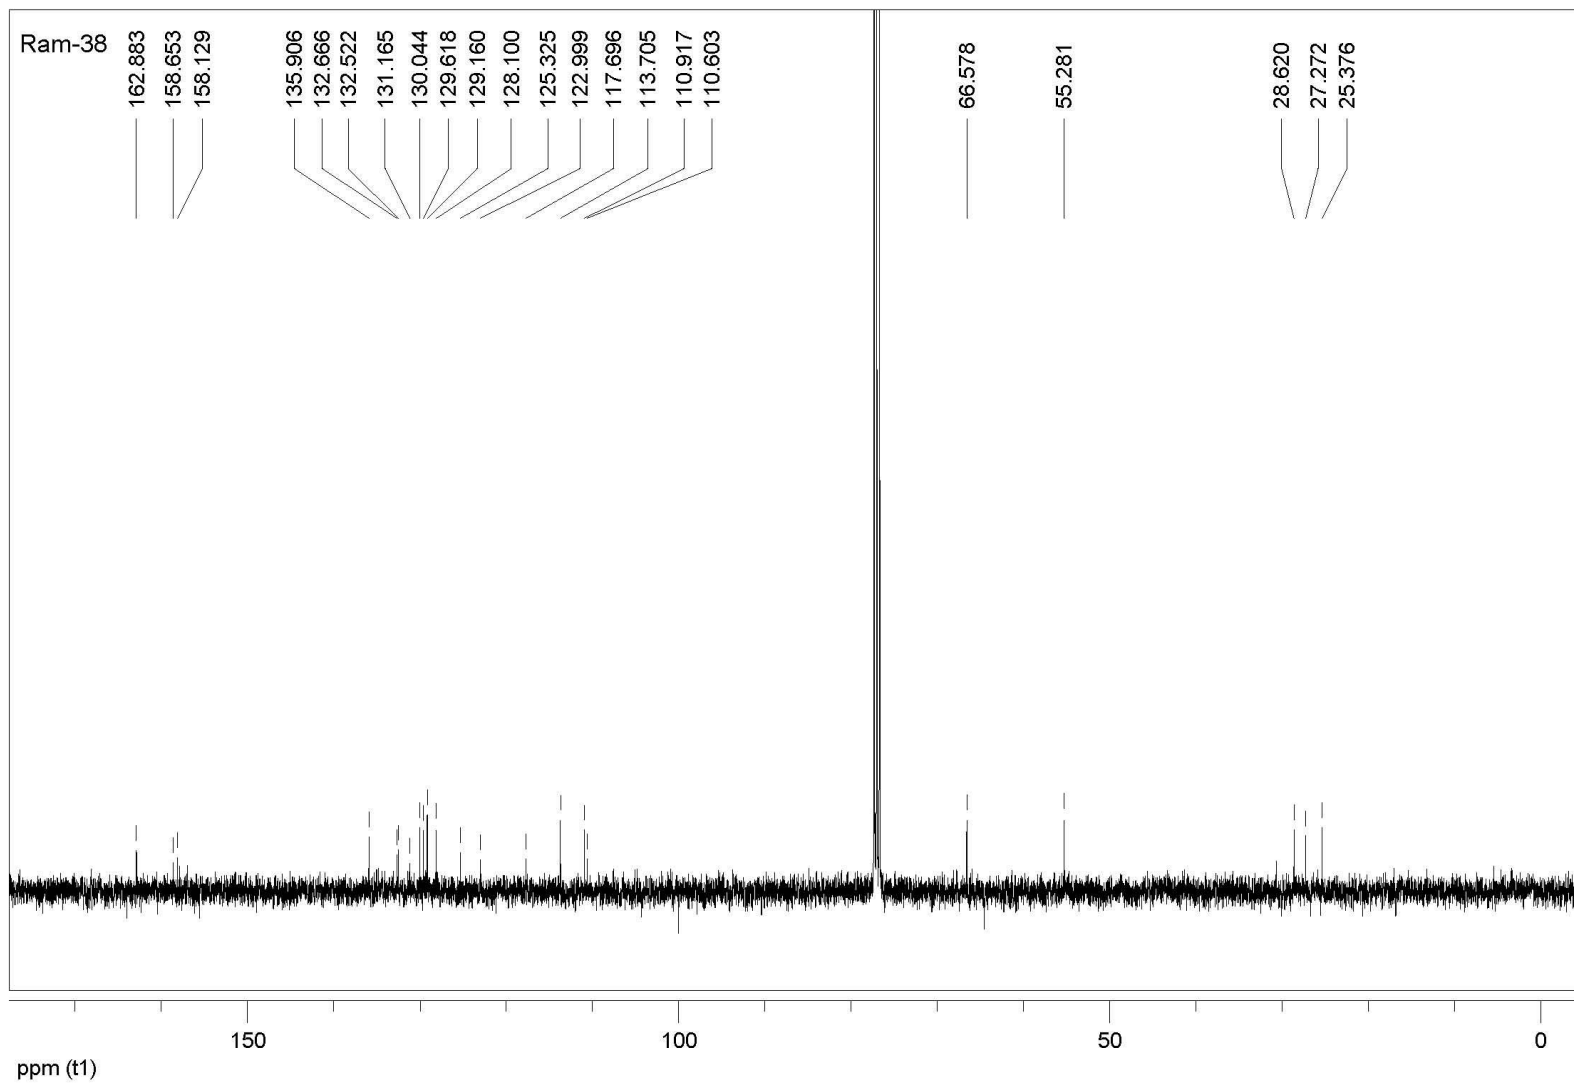

6e: (Z)-2-(9-Methoxy-5,6-dihydrobenzo[f]thiochromeno[3,4-c]chromen-3(2H)-ylidene)acetonitrile

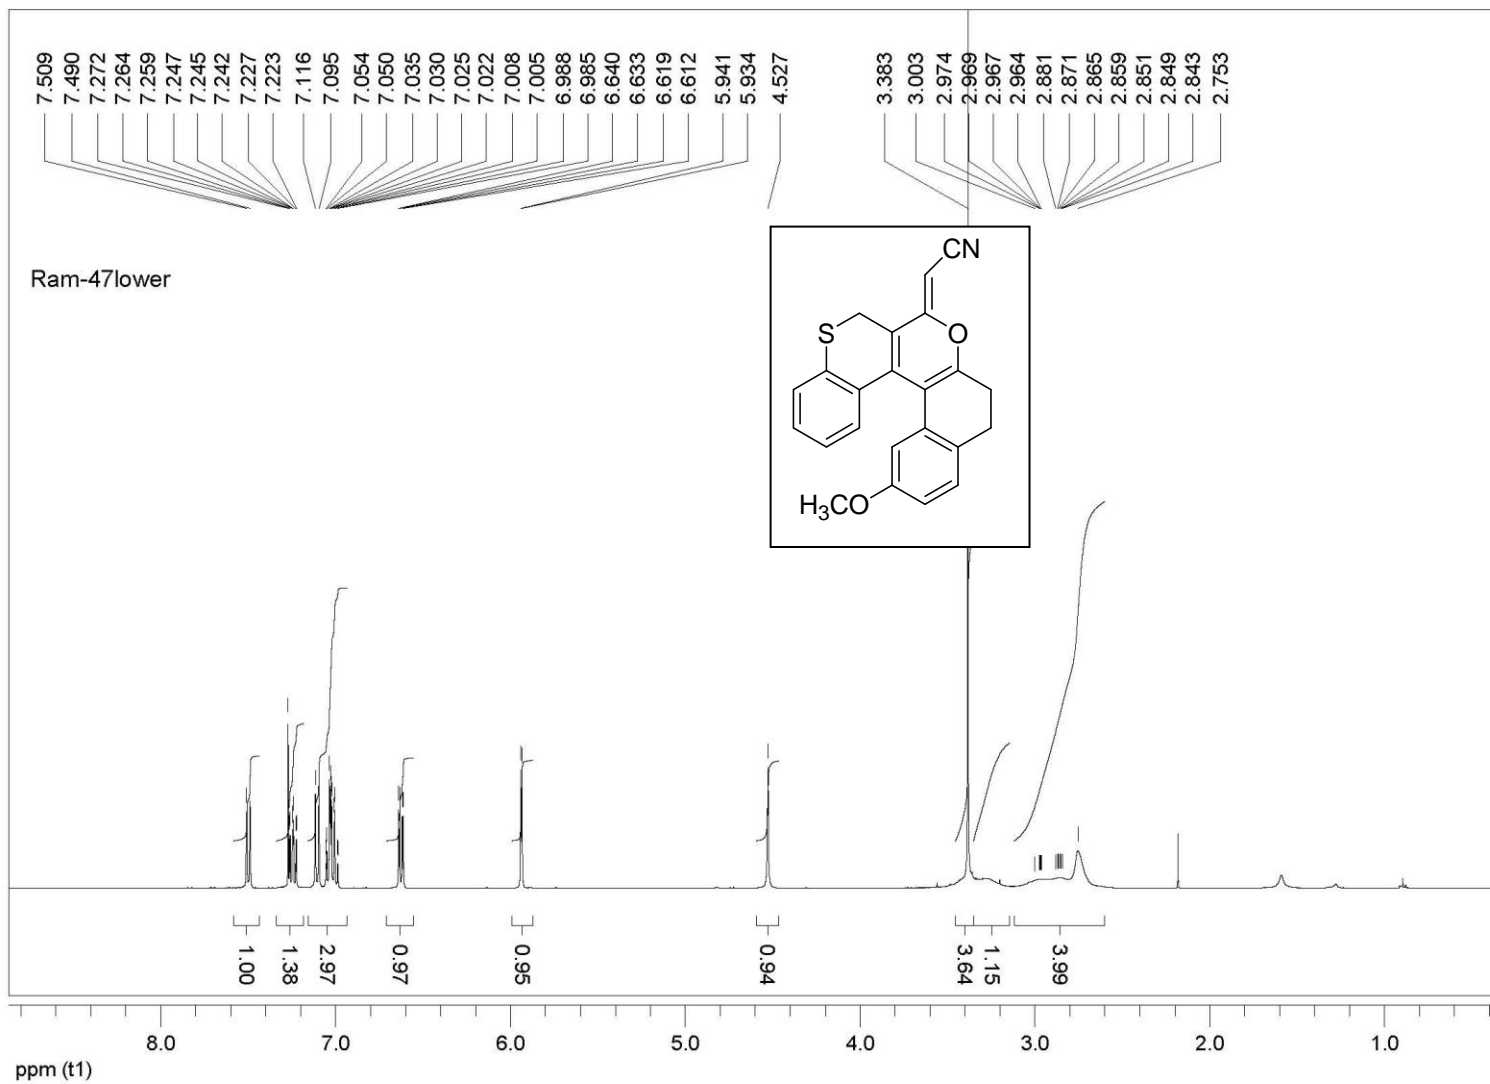



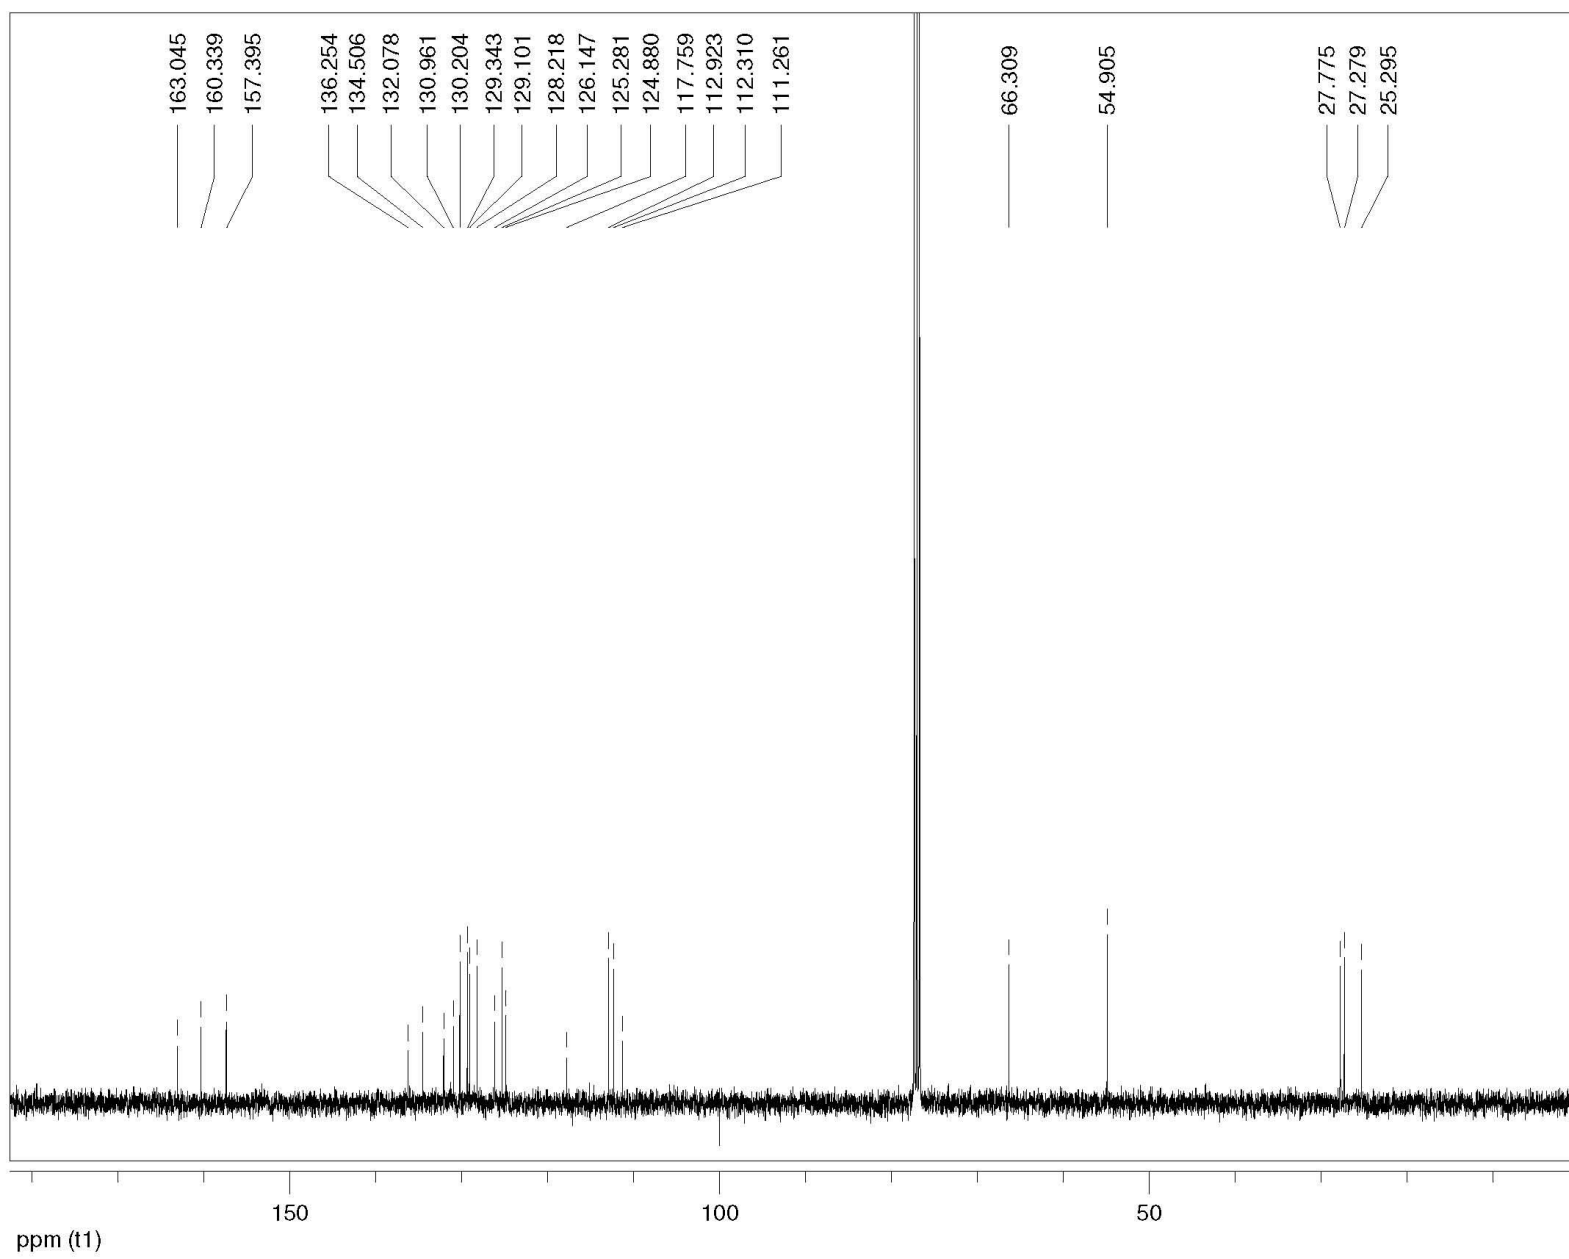

6f: (Z)-2-(12-Chloro-9-methoxy-5,6-dihydrobenzo[*f*]thiochromeno[3,4-*c*]chromen-3(2*H*)-ylidene)acetonitrile

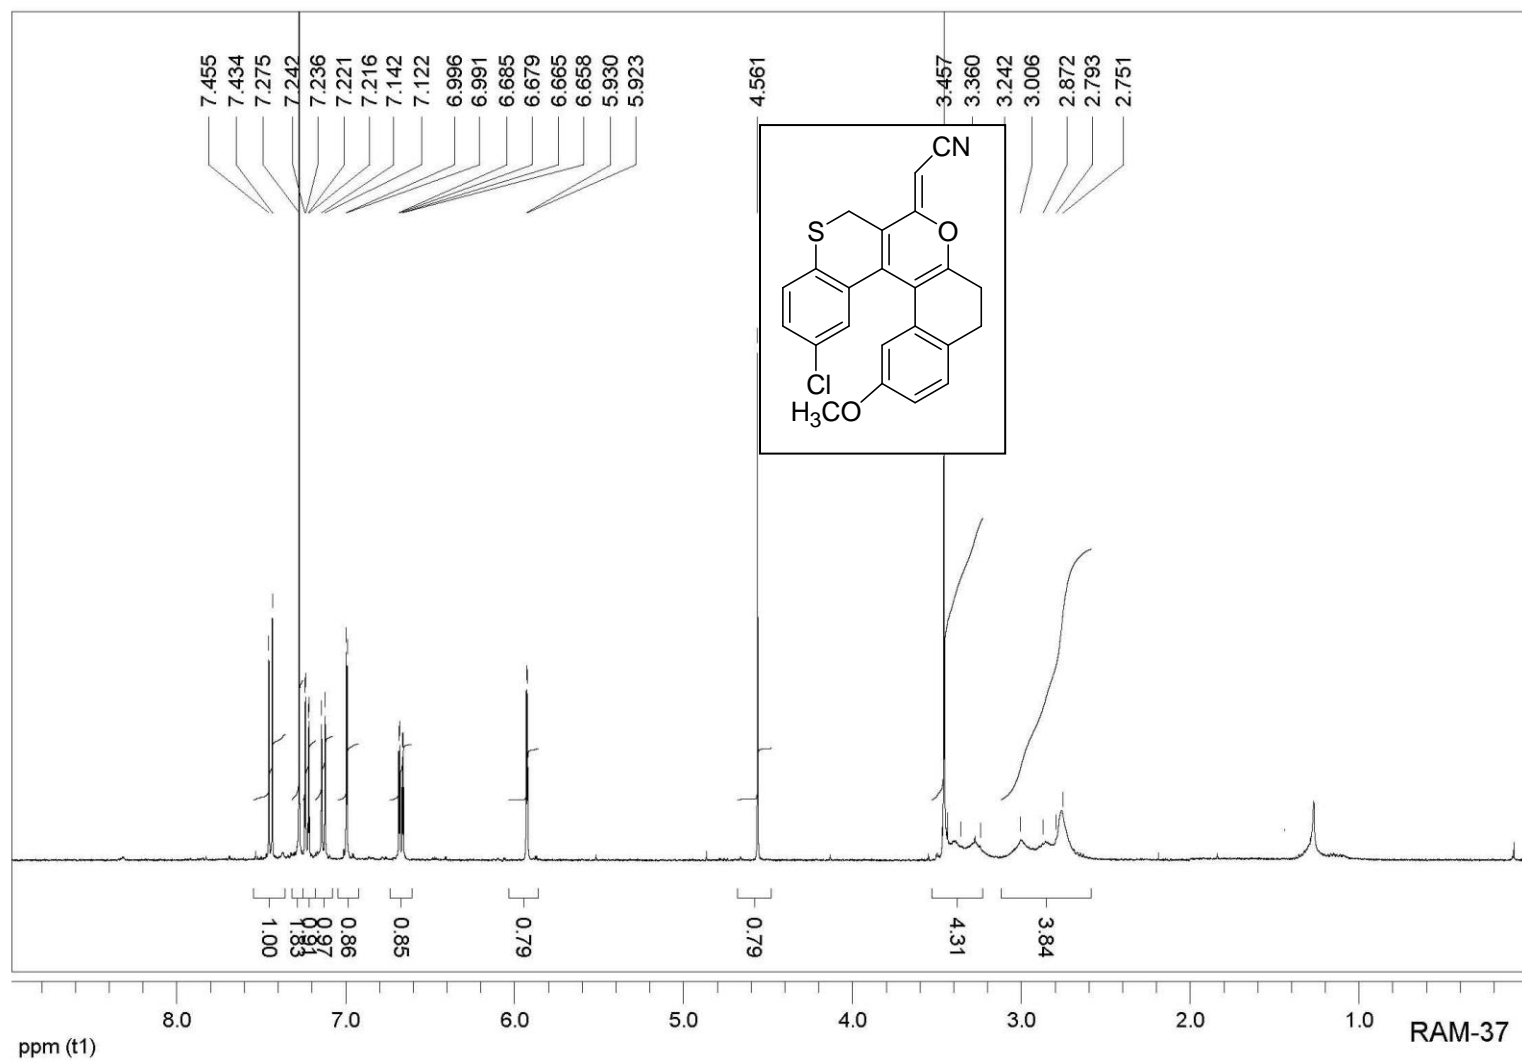

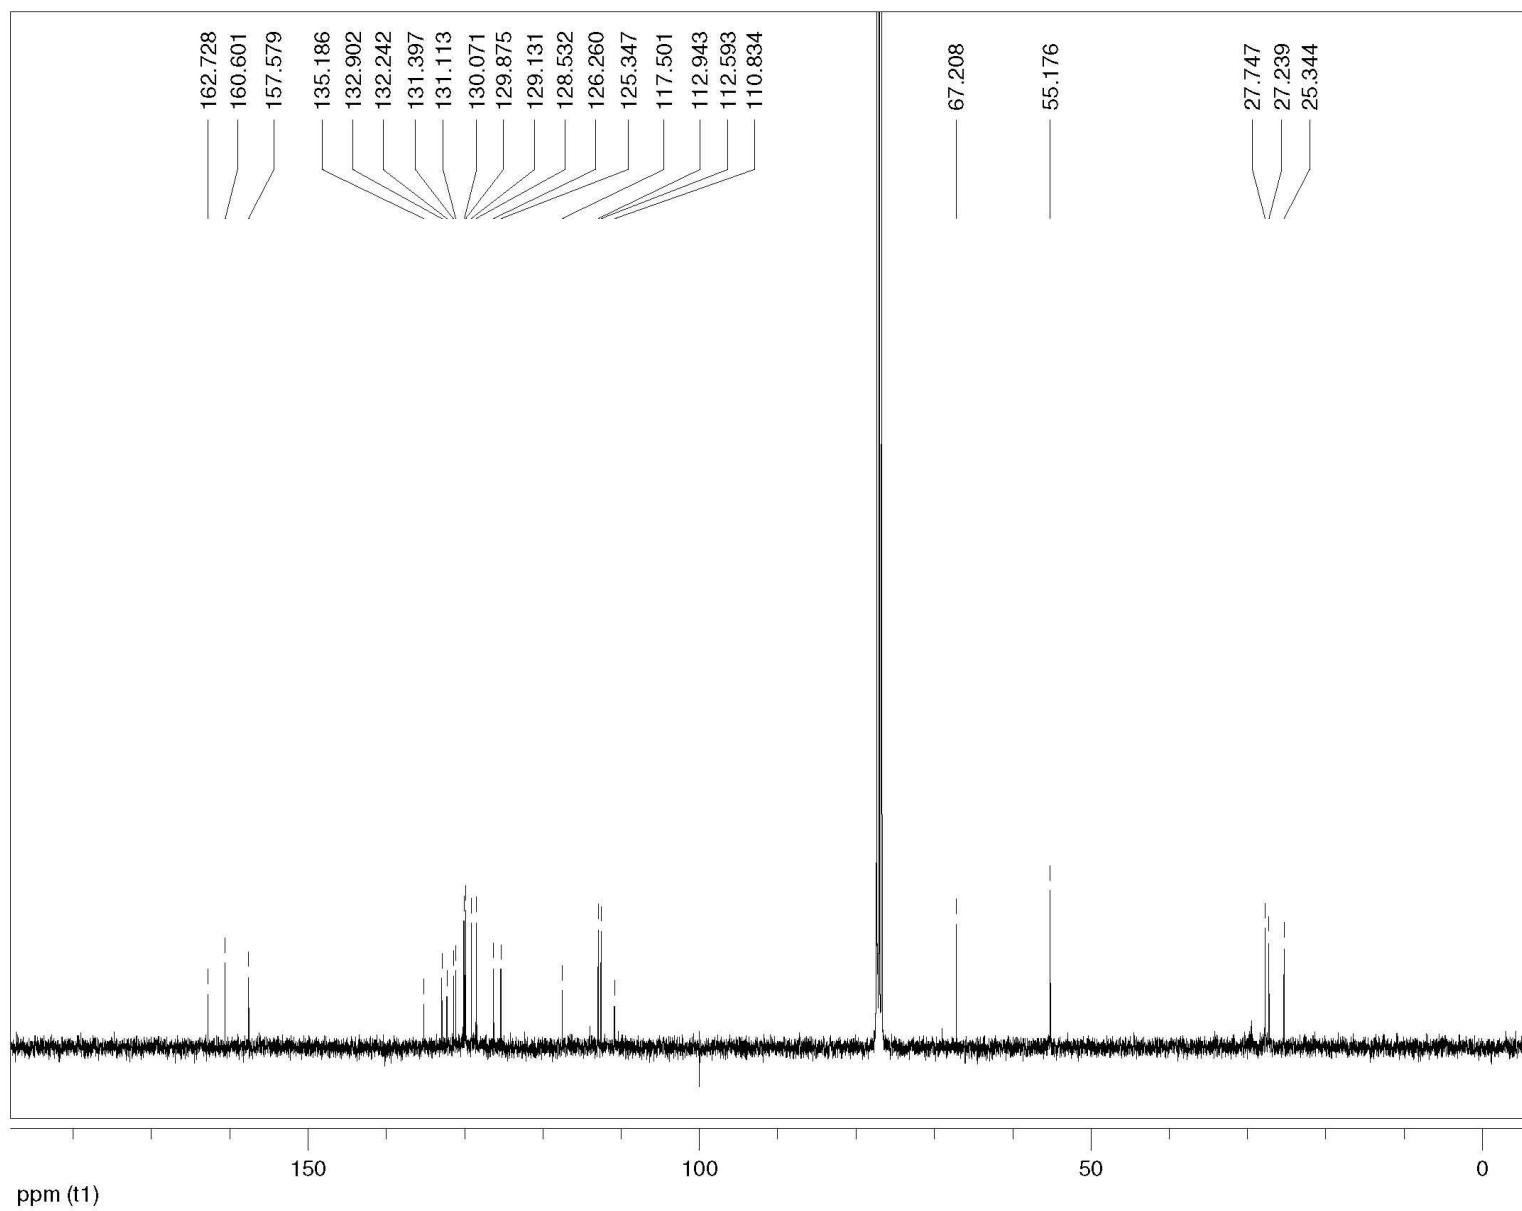

7a: 9-Methoxy-3-(piperidin-1-yl)-5,6-dihydro-2H-phenanthro[3,4-c]thiochromene-4-carbonitrile

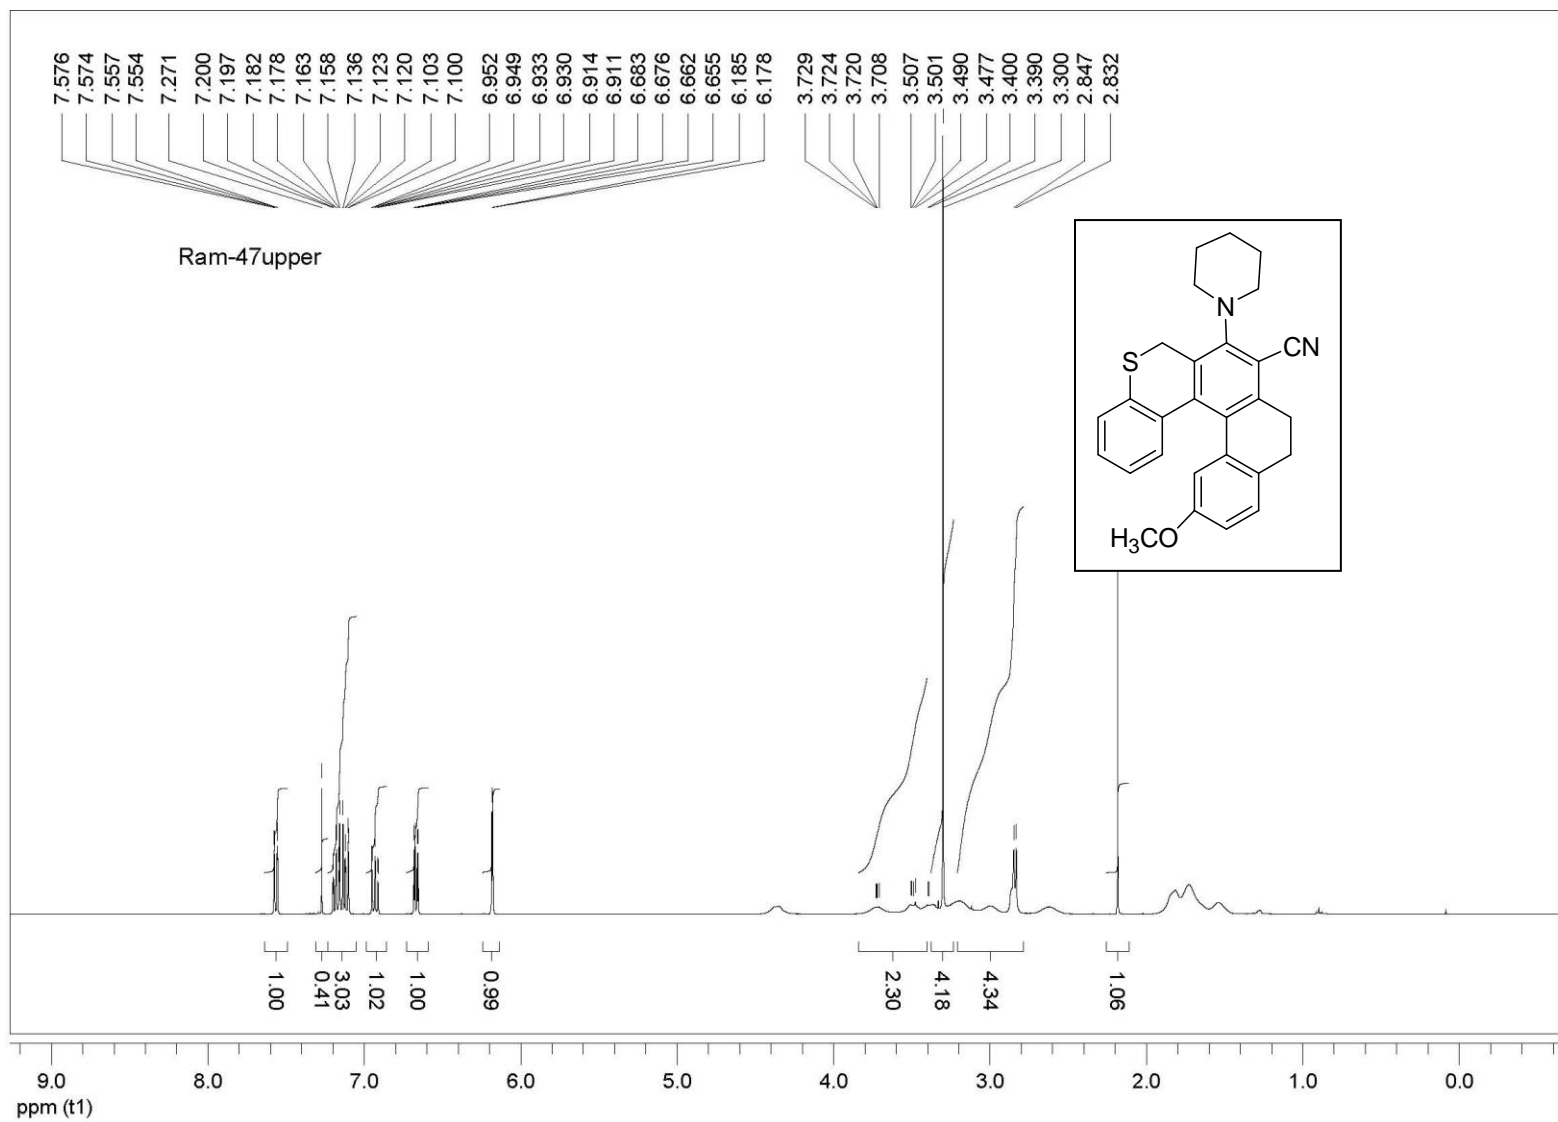

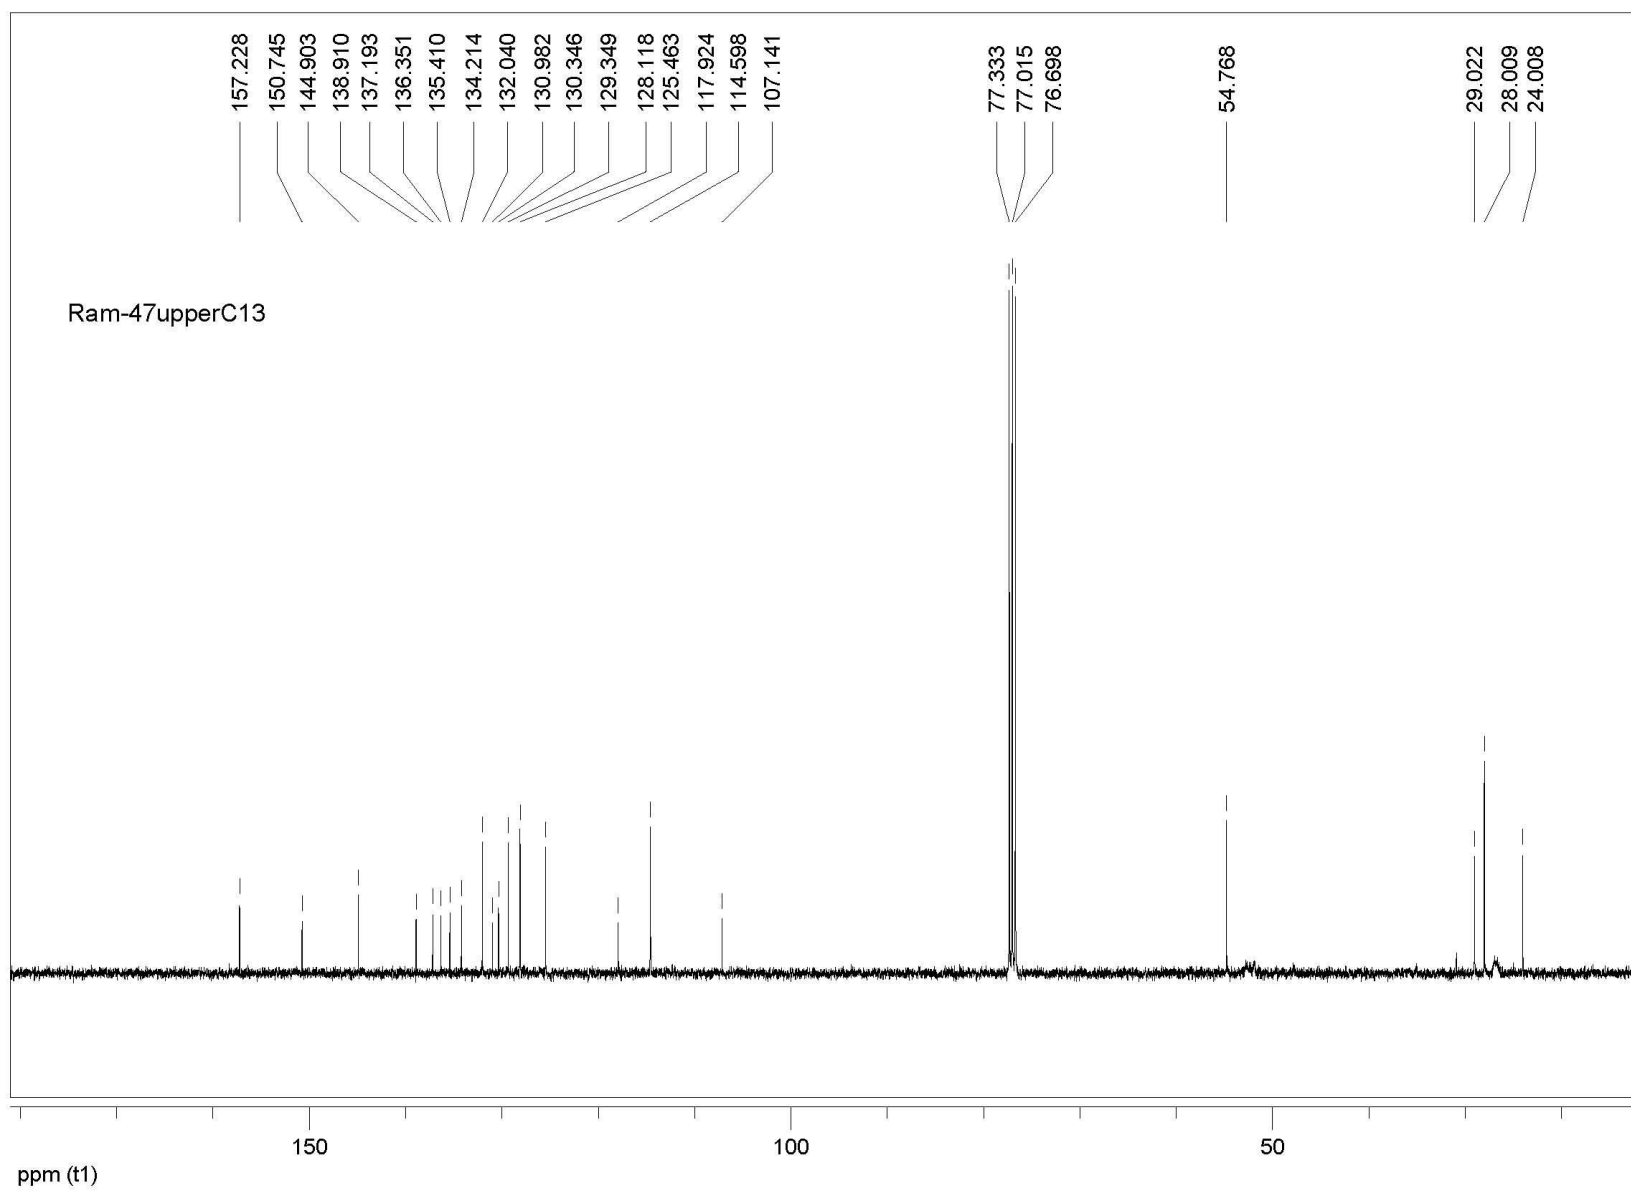

7b: 9-Methoxy-3-(morpholin-4-yl)-5,6-dihydro-2H-phenanthro[3,4-c]thiochromene-4-carbonitrile

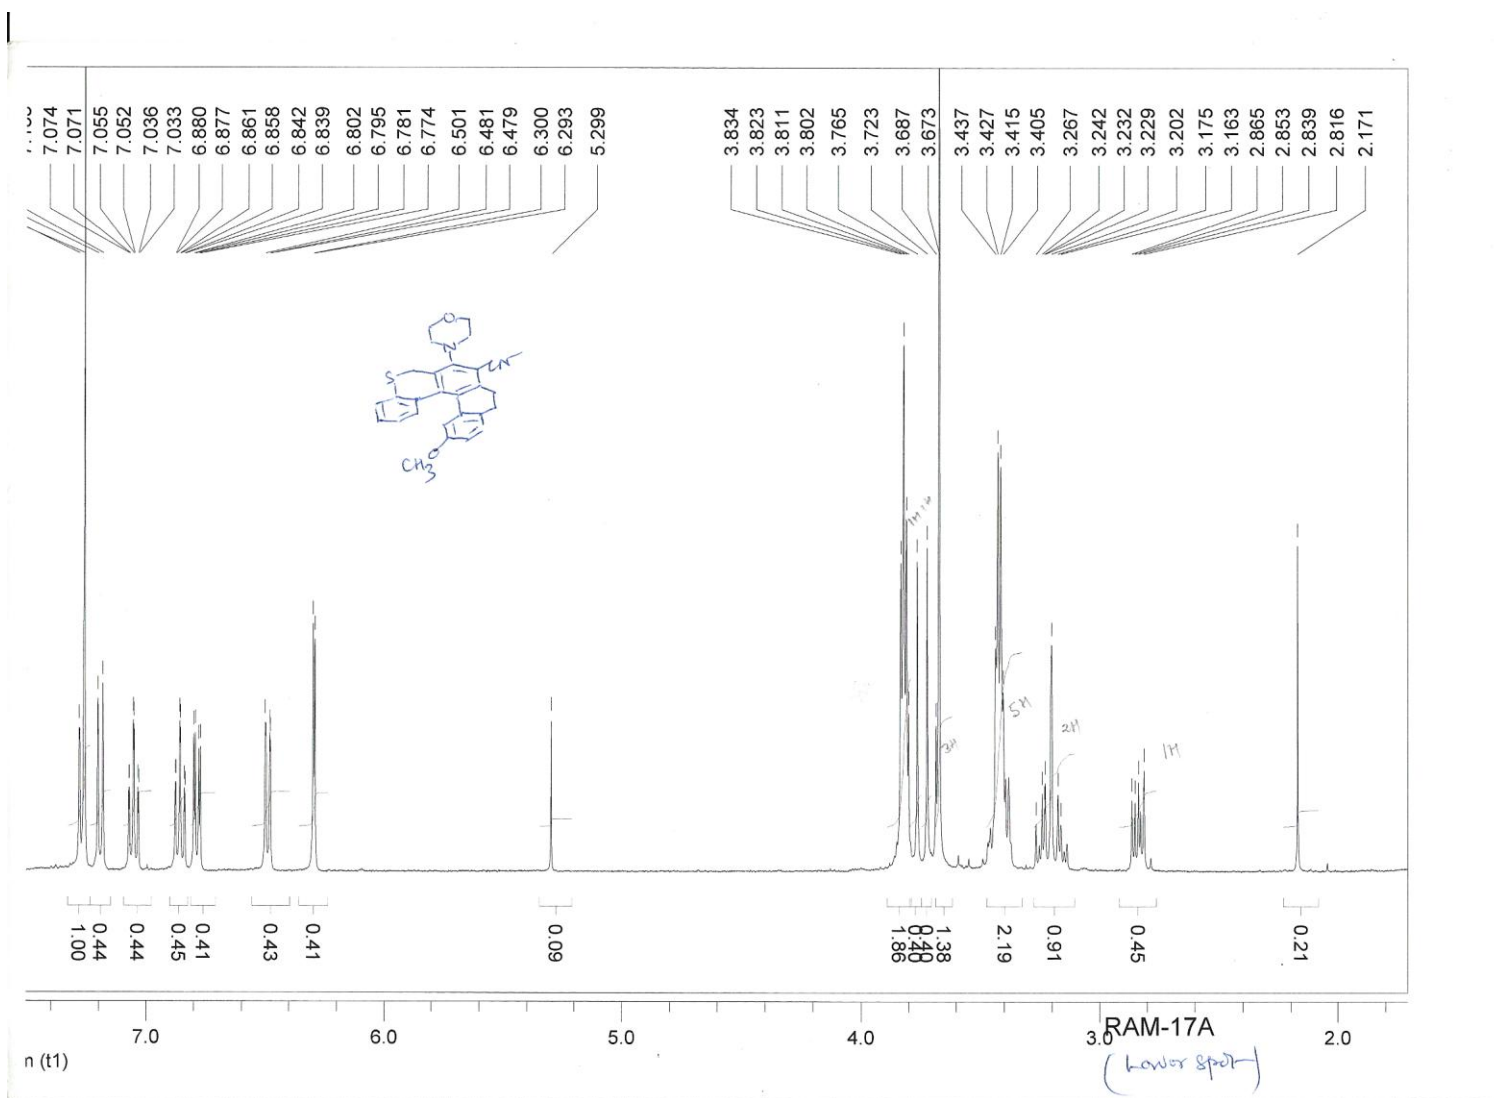

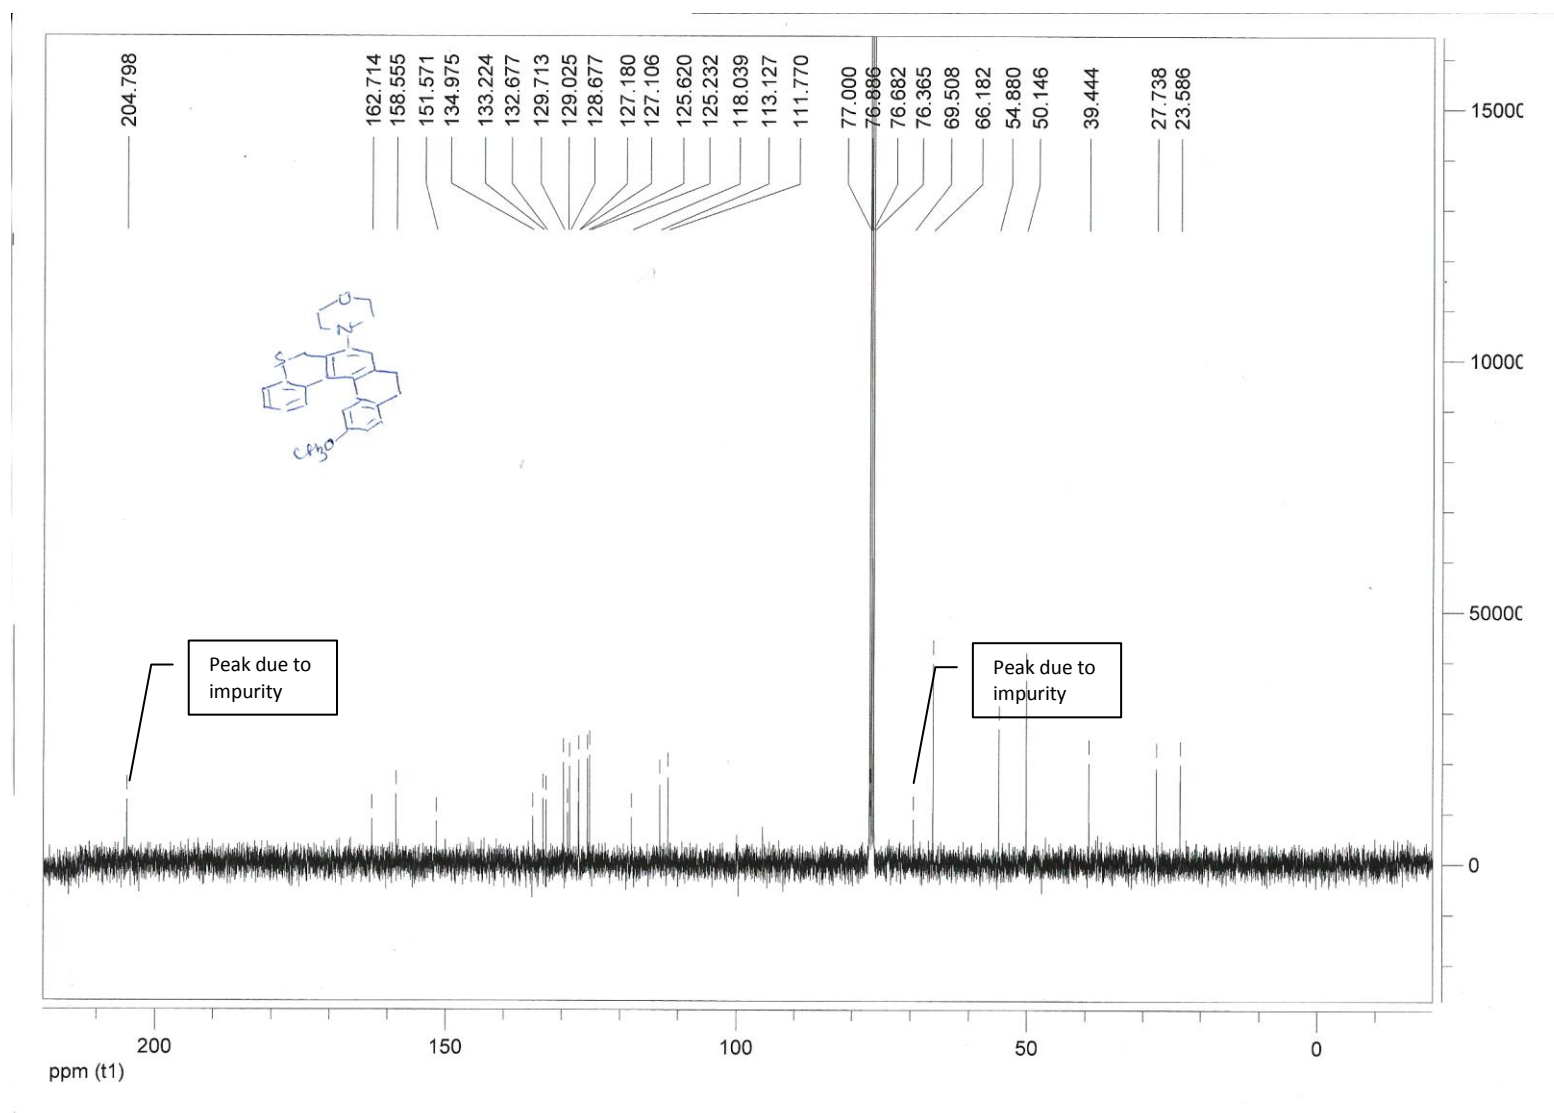

Quantum Chemical Calculation detail of 7a:

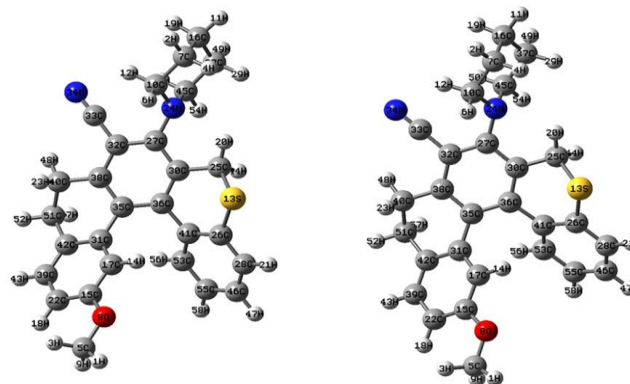

Figure S1: The optimized structures for the ground (left) and transition (right) states for 7.

TABLE S1: Key optimized structural parameters for 7.

|                                 | Ground state        | Transition state        |
|---------------------------------|---------------------|-------------------------|
| <b>Dihedral angle (°)</b>       |                     |                         |
| C17-C31-C35-C36                 | 33.38878            | 33.33793                |
| C31-C35-C36-C41                 | 18.16384            | 18.36053                |
| C35-C36-C41-C53                 | 38.47154            | 38.61200                |
| C38-C25-S13-C26                 | 59.83068            | 59.63594                |
| C25-S13-C26-C28                 | -37.44048           | -37.53963               |
| C25-C13-C26-C41                 | -37.44048           | -37.53963               |
| C36-C38-C25-C13                 | -42.21962           | -41.81075               |
| <b>Bond angle (°)</b>           |                     |                         |
| C25-S13-C26                     | 94.65063            | 94.70556                |
| <b>Non-bonding distance (Å)</b> |                     |                         |
| H14...H56                       | 3.25237             | 3.25967                 |
| C17...C53                       | 3.10125             | 3.10537                 |
|                                 | <b>Ground state</b> | <b>Transition state</b> |



| <b>Dihedral angle (°)</b>       |           |           |
|---------------------------------|-----------|-----------|
| C17-C31-C35-C36                 | 33.38878  | 33.33793  |
| C31-C35-C36-C41                 | 18.16384  | 18.36053  |
| C35-C36-C41-C53                 | 38.47154  | 38.61200  |
| C38-C25-S13-C26                 | 59.83068  | 59.63594  |
| C25-S13-C26-C28                 | -37.44048 | -37.53963 |
| C25-C13-C26-C41                 | -37.44048 | -37.53963 |
| C36-C38-C25-C13                 | -42.21962 | -41.81075 |
| <b>Bond angle (°)</b>           |           |           |
| C25-S13-C26                     | 94.65063  | 94.70556  |
| <b>Non-bonding distance (Å)</b> |           |           |
| H14...H56                       | 3.25237   | 3.25967   |
| C17...C53                       | 3.10125   | 3.10537   |

**XYZ Coordinate Ground State**

|           |          |          |                  |                  |                 |
|-----------|----------|----------|------------------|------------------|-----------------|
| <b>1</b>  | <b>1</b> | <b>0</b> | <b>6.811991</b>  | <b>0.615942</b>  | <b>2.366734</b> |
| <b>2</b>  | <b>1</b> | <b>0</b> | <b>-5.989097</b> | <b>-0.309305</b> | <b>2.530820</b> |
| <b>3</b>  | <b>1</b> | <b>0</b> | <b>6.515204</b>  | <b>-1.139977</b> | <b>2.337541</b> |
| <b>4</b>  | <b>1</b> | <b>0</b> | <b>-5.257606</b> | <b>1.186191</b>  | <b>1.947092</b> |
| <b>5</b>  | <b>6</b> | <b>0</b> | <b>6.408695</b>  | <b>-0.204880</b> | <b>1.776042</b> |
| <b>6</b>  | <b>1</b> | <b>0</b> | <b>-3.502126</b> | <b>-0.508625</b> | <b>2.225394</b> |
| <b>7</b>  | <b>6</b> | <b>0</b> | <b>-5.492786</b> | <b>0.152163</b>  | <b>1.671294</b> |
| <b>8</b>  | <b>8</b> | <b>0</b> | <b>5.044551</b>  | <b>0.115658</b>  | <b>1.548396</b> |
| <b>9</b>  | <b>1</b> | <b>0</b> | <b>6.966988</b>  | <b>-0.280833</b> | <b>0.836010</b> |
| <b>10</b> | <b>6</b> | <b>0</b> | <b>-4.191011</b> | <b>-0.601336</b> | <b>1.382256</b> |
| <b>11</b> | <b>1</b> | <b>0</b> | <b>-7.321113</b> | <b>0.720769</b>  | <b>0.642203</b> |

|    |    |   |           |           |           |
|----|----|---|-----------|-----------|-----------|
| 12 | 1  | 0 | -4.418243 | -1.669619 | 1.255388  |
| 13 | 16 | 0 | -0.601322 | 3.184219  | 0.974209  |
| 14 | 1  | 0 | 2.624999  | 0.544642  | 1.093518  |
| 15 | 6  | 0 | 4.284323  | -0.757415 | 0.825648  |
| 16 | 6  | 0 | -6.415010 | 0.139785  | 0.445922  |
| 17 | 6  | 0 | 2.949085  | -0.386262 | 0.649114  |
| 18 | 1  | 0 | 5.779295  | -2.265553 | 0.400031  |
| 19 | 1  | 0 | -6.736691 | -0.890141 | 0.247240  |
| 20 | 1  | 0 | -2.709390 | 2.167295  | 0.445371  |
| 21 | 1  | 0 | 1.519965  | 4.930585  | 0.119098  |
| 22 | 6  | 0 | 4.750169  | -1.955535 | 0.280768  |
| 23 | 1  | 0 | 0.454714  | -3.724149 | 0.641039  |
| 24 | 7  | 0 | -3.534264 | -0.024831 | 0.196193  |
| 25 | 6  | 0 | -1.733008 | 2.150933  | -0.032675 |
| 26 | 6  | 0 | 0.813156  | 2.913041  | -0.074264 |
| 27 | 6  | 0 | -2.152789 | -0.326502 | 0.001900  |
| 28 | 6  | 0 | 1.686313  | 3.968096  | -0.350309 |
| 29 | 1  | 0 | -5.473377 | 1.754561  | -0.642660 |

|    |   |   |           |           |           |
|----|---|---|-----------|-----------|-----------|
| 30 | 6 | 0 | -1.241270 | 0.730206  | -0.121265 |
| 31 | 6 | 0 | 2.069121  | -1.190088 | -0.075557 |
| 32 | 6 | 0 | -1.662562 | -1.646046 | -0.125971 |
| 33 | 6 | 0 | -2.575000 | -2.748195 | -0.171600 |
| 34 | 7 | 0 | -3.292054 | -3.652698 | -0.230843 |
| 35 | 6 | 0 | 0.628853  | -0.836984 | -0.236407 |
| 36 | 6 | 0 | 0.134818  | 0.488086  | -0.325779 |
| 37 | 6 | 0 | -5.683645 | 0.688643  | -0.785593 |
| 38 | 6 | 0 | -0.286650 | -1.907818 | -0.231554 |
| 39 | 6 | 0 | 3.856426  | -2.781187 | -0.402197 |
| 40 | 6 | 0 | 0.233810  | -3.323459 | -0.357053 |
| 41 | 6 | 0 | 1.009145  | 1.645313  | -0.661048 |
| 42 | 6 | 0 | 2.523987  | -2.429141 | -0.577163 |
| 43 | 1 | 0 | 4.209350  | -3.730853 | -0.791171 |
| 44 | 1 | 0 | -1.815491 | 2.617566  | -1.018543 |
| 45 | 6 | 0 | -4.365114 | -0.052988 | -1.019841 |
| 46 | 6 | 0 | 2.730230  | 3.796496  | -1.250940 |
| 47 | 1 | 0 | 3.398966  | 4.622415  | -1.464868 |

|    |   |   |           |           |           |
|----|---|---|-----------|-----------|-----------|
| 48 | 1 | 0 | -0.534550 | -3.966155 | -0.790071 |
| 49 | 1 | 0 | -6.310025 | 0.598248  | -1.678728 |
| 50 | 1 | 0 | -4.576627 | -1.088027 | -1.334793 |
| 51 | 6 | 0 | 1.510698  | -3.350005 | -1.205625 |
| 52 | 1 | 0 | 1.905360  | -4.366474 | -1.271737 |
| 53 | 6 | 0 | 2.030405  | 1.521010  | -1.617180 |
| 54 | 1 | 0 | -3.801557 | 0.421830  | -1.827058 |
| 55 | 6 | 0 | 2.881965  | 2.576950  | -1.910376 |
| 56 | 1 | 0 | 2.161993  | 0.574455  | -2.125585 |
| 57 | 1 | 0 | 1.268245  | -3.030733 | -2.227712 |
| 58 | 1 | 0 | 3.663677  | 2.448607  | -2.649804 |

**XYZ Coordinate Transition State**

|   |   |   |           |           |          |
|---|---|---|-----------|-----------|----------|
| 1 | 1 | 0 | 6.793261  | 0.650883  | 2.391507 |
| 2 | 1 | 0 | -5.993027 | -0.422457 | 2.518616 |
| 3 | 1 | 0 | 6.506156  | -1.106565 | 2.361383 |
| 4 | 1 | 0 | -5.213579 | 1.084289  | 2.033394 |

|    |    |   |           |           |          |
|----|----|---|-----------|-----------|----------|
| 5  | 6  | 0 | 6.398161  | -0.172336 | 1.798602 |
| 6  | 1  | 0 | -3.515582 | -0.685677 | 2.193911 |
| 7  | 6  | 0 | -5.482435 | 0.078967  | 1.690365 |
| 8  | 8  | 0 | 5.034053  | 0.140613  | 1.561808 |
| 9  | 1  | 0 | 6.963344  | -0.245735 | 0.862418 |
| 10 | 6  | 0 | -4.206160 | -0.695030 | 1.347355 |
| 11 | 1  | 0 | -7.292166 | 0.773153  | 0.704421 |
| 12 | 1  | 0 | -4.469438 | -1.742838 | 1.145005 |
| 13 | 16 | 0 | -0.615078 | 3.169251  | 0.976818 |
| 14 | 1  | 0 | 2.613745  | 0.553905  | 1.095092 |
| 15 | 6  | 0 | 4.282716  | -0.737347 | 0.835464 |
| 16 | 6  | 0 | -6.405713 | 0.176604  | 0.468955 |
| 17 | 6  | 0 | 2.946026  | -0.374748 | 0.652157 |
| 18 | 1  | 0 | 5.789135  | -2.236280 | 0.418423 |
| 19 | 1  | 0 | -6.761742 | -0.827294 | 0.205683 |
| 20 | 1  | 0 | -2.717435 | 2.139169  | 0.462819 |
| 21 | 1  | 0 | 1.490796  | 4.930287  | 0.113984 |
| 22 | 6  | 0 | 4.758788  | -1.932825 | 0.293680 |

|    |   |   |           |           |           |
|----|---|---|-----------|-----------|-----------|
| 23 | 1 | 0 | 0.472394  | -3.731633 | 0.630709  |
| 24 | 7 | 0 | -3.531544 | -0.056892 | 0.204677  |
| 25 | 6 | 0 | -1.746058 | 2.131510  | -0.025987 |
| 26 | 6 | 0 | 0.796270  | 2.908401  | -0.077843 |
| 27 | 6 | 0 | -2.152140 | -0.348998 | -0.002429 |
| 28 | 6 | 0 | 1.661972  | 3.968996  | -0.355898 |
| 29 | 1 | 0 | -5.417642 | 1.827596  | -0.519798 |
| 30 | 6 | 0 | -1.246542 | 0.714082  | -0.124557 |
| 31 | 6 | 0 | 2.074685  | -1.184697 | -0.076211 |
| 32 | 6 | 0 | -1.653896 | -1.664919 | -0.139581 |
| 33 | 6 | 0 | -2.560213 | -2.769648 | -0.209945 |
| 34 | 7 | 0 | -3.273158 | -3.676273 | -0.293955 |
| 35 | 6 | 0 | 0.632751  | -0.841811 | -0.242012 |
| 36 | 6 | 0 | 0.130118  | 0.480283  | -0.331355 |
| 37 | 6 | 0 | -5.658383 | 0.778942  | -0.727936 |
| 38 | 6 | 0 | -0.275757 | -1.918194 | -0.241016 |
| 39 | 6 | 0 | 3.873797  | -2.764352 | -0.393678 |
| 40 | 6 | 0 | 0.254144  | -3.330194 | -0.367724 |

|    |   |   |           |           |           |
|----|---|---|-----------|-----------|-----------|
| 41 | 6 | 0 | 0.998120  | 1.642280  | -0.665855 |
| 42 | 6 | 0 | 2.540043  | -2.420763 | -0.575641 |
| 43 | 1 | 0 | 4.234754  | -3.711761 | -0.780517 |
| 44 | 1 | 0 | -1.841371 | 2.602503  | -1.008589 |
| 45 | 6 | 0 | -4.360405 | 0.017598  | -1.010024 |
| 46 | 6 | 0 | 2.705068  | 3.803815  | -1.258803 |
| 47 | 1 | 0 | 3.368151  | 4.633810  | -1.474148 |
| 48 | 1 | 0 | -0.508069 | -3.976699 | -0.805999 |
| 49 | 1 | 0 | -6.287415 | 0.762432  | -1.623701 |
| 50 | 1 | 0 | -4.597556 | -0.990646 | -1.388891 |
| 51 | 6 | 0 | 1.535591  | -3.347358 | -1.209943 |
| 52 | 1 | 0 | 1.936956  | -4.361274 | -1.275473 |
| 53 | 6 | 0 | 2.018685  | 1.523902  | -1.623478 |
| 54 | 1 | 0 | -3.783657 | 0.525717  | -1.786897 |
| 55 | 6 | 0 | 2.863418  | 2.585030  | -1.918087 |
| 56 | 1 | 0 | 2.154929  | 0.578145  | -2.132040 |
| 57 | 1 | 0 | 1.296090  | -3.028253 | -2.232827 |

|    |   |   |          |          |           |
|----|---|---|----------|----------|-----------|
| 58 | 1 | 0 | 3.644795 | 2.461327 | -2.658543 |
|----|---|---|----------|----------|-----------|
